# Supplementary material for: Comprehensive Binary Interaction Mapping of SH2 Domains via Fluorescence Polarization Reveals Novel Functional Diversification of ErbB Receptors
Source: PLOS journal article supplement (doi:10.1371/journal.pone.0044471), 2012-09-04

## EGFR

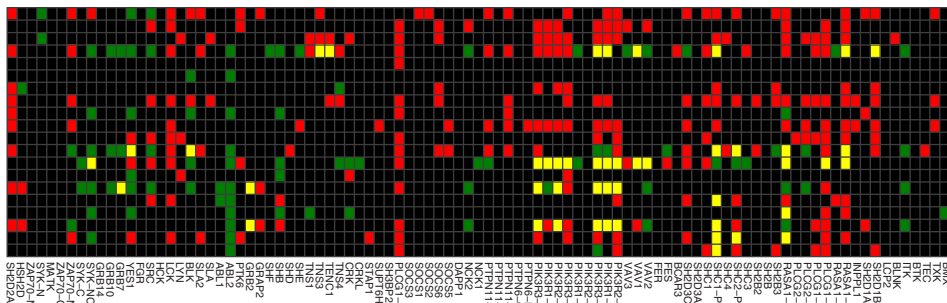

FGTVXKGLWIPED (ErbB1-pY727)  
 LDEAXVMASVDND (ErbB1-pY764)  
 CLLDXVREHKDND (ErbB1-pY801)  
 IGSQXLLNWCYQD (ErbB1-pY813)  
 KGMXKLEDRRLVQ (ErbB1-pY817)  
 EREKXHAEGGKVD (ErbB1-pY869)  
 LHRITXTHQSDVMD (ErbB1-pY891\*1)  
 DVWSXGVTWVWELD (ErbB1-pY900\*2)  
 GSKFPXDGIPTREED (ErbB1-pY915\*3)  
 TTDVXMMVKCWD (ErbB1-pY944\*4)  
 DPOKXLVITQGDDE (ErbB1-pY978\*5)  
 DSNFXRALMDEED (ErbB1-pY998)  
 DAEEXLIPQOGFQD (ErbB1-pY1016)  
 FLQKXSSDFPTGAD (ErbB1-pY1069)  
 PTFEXINQSVKGD (ErbB1-pY1092)  
 QNPFVXNQPLNPD (ErbB1-pY1110)  
 RDPFXHQDPHSTAD (ErbB1-pY1125)  
 GNPEXLNTVQPTD (ErbB1-pY1138)  
 DNPDXQDDFFKQD (ErbB1-pY1172)  
 ENAEXLRVAPQSD (ErbB1-pY1197)

## ErbB2

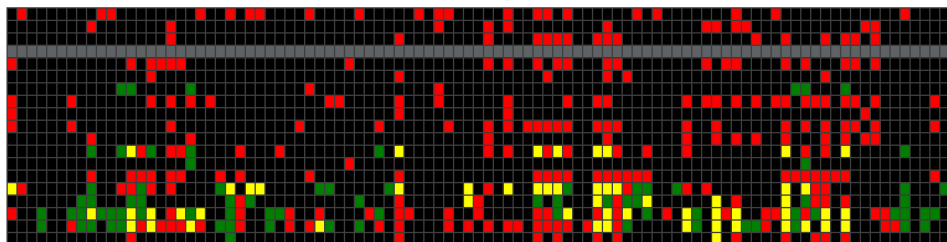

KIRKXTMRRLQLD (ErbB2-pY685)  
 FGTVXKGLWIPED (ErbB2-pY735)  
 LDEAXVMASVDND (ErbB2-pY770)  
 VGSXPVSRLLGID (ErbB2-pY781-NI)  
 QLMXPVGLLDHVD (ErbB2-pY803)  
 QGMSXLEDVRLVD (ErbB2-pY835)  
 DETEXHADGGKVD (ErbB2-pY871)  
 DVWSXGVTWVWELD (ErbB2-pY908\*2)  
 GAKFPXDGIPTREED (ErbB2-pY923\*3)  
 TTDVXMMVKCWD (ErbB2-pY952\*4)  
 DSTFXRSLLEDDE (ErbB2-pY1005)  
 DAEEXLIPQOGFQD (ErbB2-pY1023\*5)  
 PLOKXEDPTVFD (ErbB2-pY1112)  
 ETDGXVAPLITCSD (ErbB2-pY1127)  
 PQPEXVNPQDVDR (ErbB2-pY1139)  
 ENPEXLTPQGGAD (ErbB2-pY1196)  
 FDLXVWMDQPPVD (ErbB2-pY1281)  
 DNLVXWMDQPPVD (ErbB2-pY1222)  
 ENPEXLGLDVPVD (ErbB2-pY1248)

## ErbB3

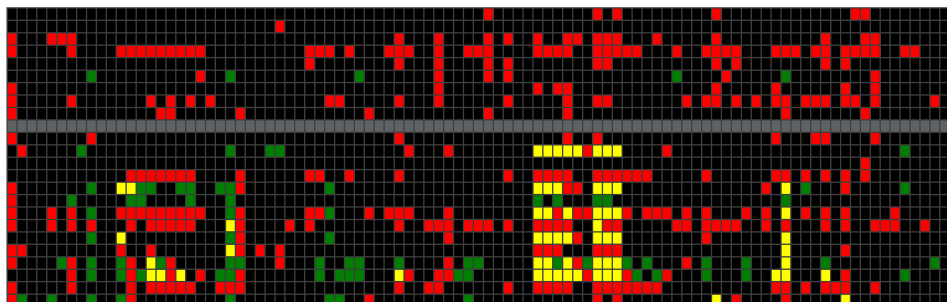

GTFLXWRRRLQD (ErbB3-pY665)  
 AMRXKLEDRRLVQ (ErbB3-pY710)  
 LVTOXPLPLGSLD (ErbB3-pY789)  
 AKGMXYLEEKGMD (ErbB3-pY823)  
 KGMXYLEEKGMD (ErbB3-pY824)  
 KQLXSEAKTPIQD (ErbB3-pY868)  
 FPGKXTHQSDVMD (ErbB3-pY884\*1)  
 DVWSXGVTWVWELD (ErbB3-pY897\*2)  
 GAEPXAGLRLAED (ErbB3-pY912)  
 TTDVXMMVKCWD (ErbB3-pY941\*7NS)  
 DPEKXLVITQGDDE (ErbB3-pY974)  
 PSCGXVAPLITCSD (ErbB3-pY975)  
 GDSAXHSQRHSL (ErbB3-pY1132)  
 DVNGXVMPDTHL (ErbB3-pY1159)  
 EDEEXEYMNRRQD (ErbB3-pY1197)  
 EDEEXEYMNRRQD (ErbB3-pY1216)  
 EELGXVMDVGSGLD (ErbB3-pY1222)  
 LGYEXMDVGSGLD (ErbB3-pY1224)  
 PDEEXEYMNRRQD (ErbB3-pY1260)  
 EDEEXEYMNRRQD (ErbB3-pY1262)  
 PFGXVAPLITCSD (ErbB3-pY1276)  
 SEQGXEMRAFQD (ErbB3-pY1289)  
 PHVXARLKLTLR (ErbB3-pY1307)  
 DNPDXWHSRLFPD (ErbB3-pY1328)

## ErbB4

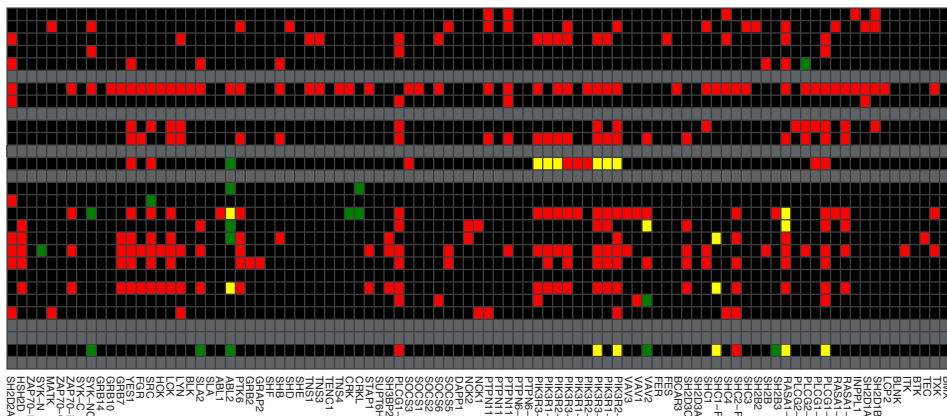

TFAVXVRRKSKD (ErbB4-pY664)  
 FGTVXKGLWIPED (ErbB4-pY733)  
 CLLEXVHEHKDND (ErbB4-pY807)  
 KGMXKLEDRRLVQ (ErbB4-pY833)  
 ECIHRKRRKTHQSD (ErbB4-pY894-NS)  
 DVWSXGVTWVWELD (ErbB4-pY906)  
 GSKFPXDGIPTREED (ErbB4-pY921\*3)  
 TTDVXMMVKCWD (ErbB4-pY950\*7NS)  
 DPOKXLVITQGDDE (ErbB4-pY978\*5)  
 DAEEXLIPQOGFQD (ErbB4-pY1022\*6)  
 PPIIXTSRARIID (ErbB4-pY1035-NI)  
 PPPAXTPMSGNQD (ErbB4-pY1056)  
 NQFVXRDPGGFAAD (ErbB4-pY1066-NI)  
 VSVFXRDPGGFAAD (ErbB4-pY1081)  
 STORXSADPTVFD (ErbB4-pY1128)  
 DEEGXMTPMRD (ErbB4-pY1150)  
 PKQEXLNPVEEND (ErbB4-pY1162)  
 DNPFXHNASGPD (ErbB4-pY1188)  
 ASDEXVMDVGSGLD (ErbB4-pY1220)  
 NEPLXLNTFANTD (ErbB4-pY1208)  
 GKAEKXKNNILSD (ErbB4-pY1221)  
 DNPDXWHSRLFPD (ErbB4-pY1242)  
 QHPDXVMDVGSGLD (ErbB4-pY1258)  
 VLPQXSTKTVFK (ErbB4-pY1262)  
 YSTKXFXKQNGRD (ErbB4-pY1266-NI)  
 TKYFXKQNGRIRD (ErbB4-pY1268-NI)  
 ENPEXLSSEFSLK (ErbB4-pY1284)  
 PPPFXRRHTTVVD (ErbB4-pY1301-NI)

X, pY phosphotyrosine  
 \*1 - 7 homologous peptides  
 \*NI no positive interaction hits  
 \*NS peptide not synthesized

Neither

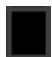

FP only

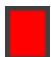

PM only

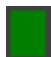

Both

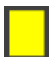

NI or NS

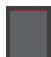

Supplement: S6 (10.1371/journal.pone.0044471.s006) [file journal.pone.0044471.s006.pdf › journal.pone.0044471.s006.pdf]
