# Supplementary material for: Comprehensive Binary Interaction Mapping of SH2 Domains via Fluorescence Polarization Reveals Novel Functional Diversification of ErbB Receptors
Source: PLOS journal article supplement (doi:10.1371/journal.pone.0044471), 2012-09-04

# EGFR

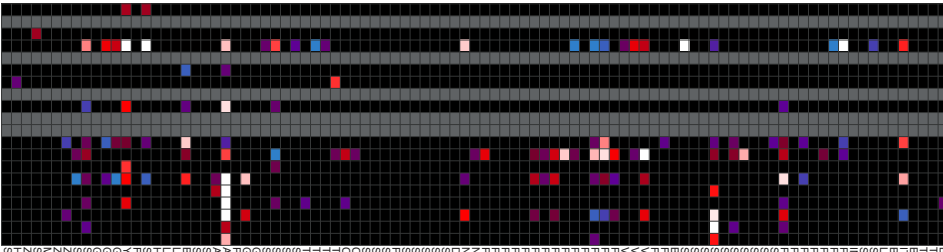

- LGSAFTGVTXKGLWIPed (ErbB1-pY727)
- LDEAXVMASVDNd (ErbB1-pY764)
- LMPPFGCLLDXVREHKDd (ErbB1-pY801)
- EHKNDIGQXILANVWQd (ErbB1-pY813)
- KGMNXLDERRLVd (ErbB1-pY827)
- KLLGAEKEKXHAEGGKvd (ErbB1-pY869)
- ALESILHRTXTHQSDVWd (ErbB1-pY891\*1)
- DVWSXGVTWELd (ErbB1-pY900\*2)
- ELMTFGSKPXDGIPTASd (ErbB1-pY915\*3)
- TIDVMMVMVKCwd (ErbB1-pY944\*4)
- DPQRKLVIOGDDd (ErbB1-pY978\*5)
- LFPTDGNFXRALMDd (ErbB1-pY998)
- MDDVVDADEXLIPQOGFd (ErbB1-pY1016)
- IKEDSFLORXSSDPTGAd (ErbB1-pY1069)
- DDTFLPVPKXINOSVVKd (ErbB1-pY1092)
- FAGSXYNPEXVHNGPLFd (ErbB1-pY1110)
- NFAPSRDPHXODPHSTAd (ErbB1-pY1125)
- HSTAVGNPEXLTNVOPTd (ErbB1-pY1138)
- HOISLDNPDQDQDFPKd (ErbB1-pY1172)
- KGSTAEANAEXLRVAPQsd (ErbB1-pY1197)

# ErbB2

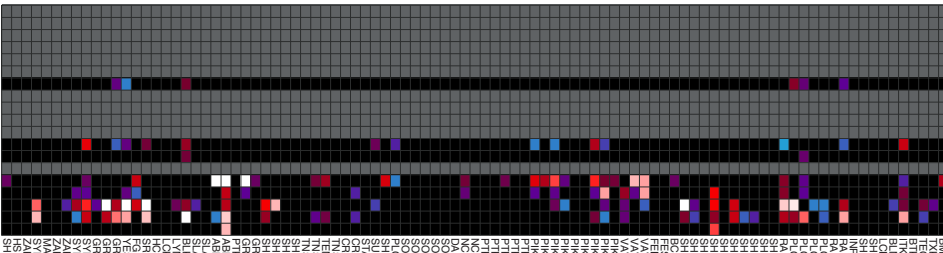

- KIRKXTMRRLLQd (ErbB2-pY685)
- FCTVXKGIWVPEd (ErbB2-pY733)
- LDEAXVMAGVGSd (ErbB2-pY772)
- VGSPXVSRLLGId (ErbB2-pY781)
- QMLXKGLLDHVD (ErbB2-pY783)
- KGMXSLDEHVLVd (ErbB2-pY783)
- RLLDIDETEXHADGGKvd (ErbB2-pY877)
- DVWSXGVTWELd (ErbB2-pY908\*2)
- GAKPXDGIPTAREd (ErbB2-pY923\*3)
- TIDVMMVMVKCwd (ErbB2-pY923\*3)
- DSTFXRSLLEDDd (ErbB2-pY1005)
- MGLDVAEEXLVPQOGFd (ErbB2-pY1023\*6)
- THDPSLPQRKSDPTVPd (ErbB2-pY1112)
- ETDQXVAFITCSd (ErbB2-pY1127)
- PLTCSPOPEXVNOPDVR (ErbB2-pY1139)
- FGGAVENPEXLTPOGGA (ErbB2-pY1196)
- AFSPAFDNLXVNDODPPE (ErbB2-pY1221)
- AFSPAFDNLXVNDODPPE (ErbB2-pY1222)
- GPTPAENPEXILGLVVP (ErbB2-pY1248)

# ErbB3

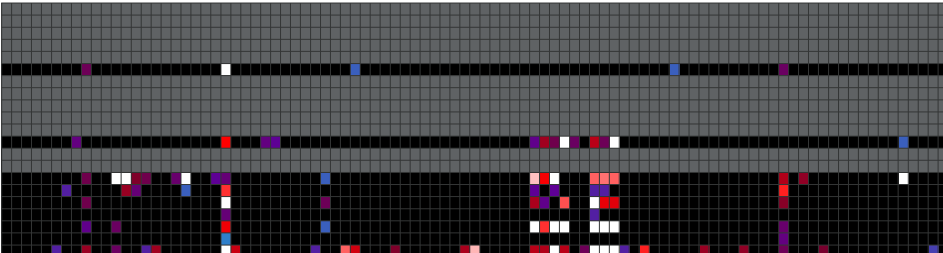

- GTFLXWGRRIId (ErbB3-pY665)
- AMRRXLERGESId (ErbB3-pY680)
- LVTQXLPGLSLL (ErbB3-pY789)
- AKGKXLYLEHGMd (ErbB3-pY828)
- KGMXSLDEHVLVd (ErbB3-pY828)
- LPDDKOLLXSEAKTPI (ErbB3-pY868)
- HFQKXTHQSDVWd (ErbB3-pY888\*1)
- DVWSXGVTWELd (ErbB3-pY897\*2)
- GAEFYAGLIPARd (ErbB3-pY912)
- TIDVMMVMVKCwd (ErbB3-pY941\*7)
- DPPRXLVIKRESd (ErbB3-pY975)
- QSLSPFSGXMPMQGN (ErbB3-pY1054)
- GDSKSGQDRLSAMGAPd (ErbB3-pY1130)
- DVNGXVMPDTHL (ErbB3-pY1153)
- TEEDEDEDEEXEYMNRRR (ErbB3-pY1197)
- TEEDEDEDEEYEMNRRRH (ErbB3-pY1199)
- RPSLEDEDEEYEMNRRR (ErbB3-pY1223)
- RPSSLEBLEYEXMVDGSDI (ErbB3-pY1224)
- TAGTTPDEDEXEYMNRRR (ErbB3-pY1260)
- TAGTTPDEDEXEYMNRRRD (ErbB3-pY1262)
- GACFPASQGXGEMRPAF (ErbB3-pY1289)
- PHVHXARLKTLR (ErbB3-pY1307)
- TDSPAENPDQXWHSRLFP (ErbB3-pY1328)

# ErbB4

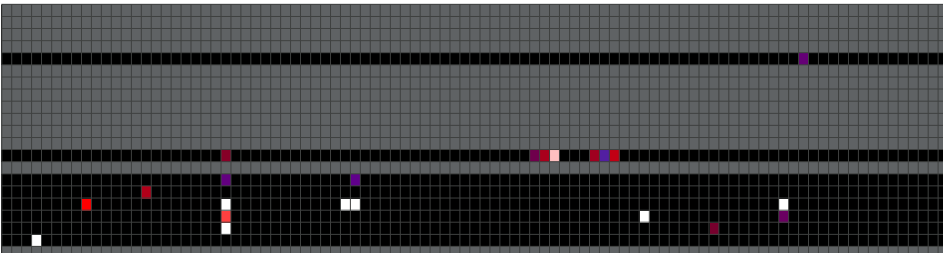

- TFAVXVRRRSIKd (ErbB4-pY664)
- FCTVXKGIWVPEd (ErbB4-pY733)
- CLLEKXVHEHKDd (ErbB4-pY833)
- KGMNXLERRLLVd (ErbB4-pY833)
- RLLEGGDKEXXNADGGKd (ErbB4-pY875)
- ECIHXRKFTHQSD (ErbB4-pY906)
- DVWSXGVTWELd (ErbB4-pY941)
- GKPKXDGIPTRED (ErbB4-pY921\*3)
- TIDVMMVMVKCwd (ErbB4-pY950\*7)
- DPQRKLVIOGDDd (ErbB4-pY984\*5)
- DEKEXLVPQATN (ErbB4-pY1021\*6)
- DPPELXTSRARIId (ErbB4-pY1035)
- EIGHSPPPAAXTFMSGNod (ErbB4-pY1056)
- NOFVXKRDGGFAAd (ErbB4-pY1068)
- ARAGCGVGVVRAFPSTId (ErbB4-pY1081)
- VOEDSSTORXSADPTVEd (ErbB4-pY1128)
- PRGLEDDEEGXMTPMRDkd (ErbB4-pY1150)
- PMRDKPKQEXLNPVEENG (ErbB4-pY1162)
- DLQGLDNDPEXVHNGPLFd (ErbB4-pY1162)
- NGCFARDEKXVNEPLVId (ErbB4-pY1202)
- NEPLXLTNFAANTd (ErbB4-pY1208)
- GKAEKLNKNNLSd (ErbB4-pY1221)
- HRKAFDNPDXLWHSRLFPd (ErbB4-pY1242)
- HRKAFDNPDXLWHSRLFPd (ErbB4-pY1248)
- YLOEXSTKYFYK (ErbB4-pY1262)
- YSTRKXFKYKNGRd (ErbB4-pY1266)
- TYFXKQNGRIRd (ErbB4-pY1269)
- RPTVYVAVNPEXVHNGPLFd (ErbB4-pY1284)
- PPPPXRRHNTVVd (ErbB4-pY1301)

X, pY phosphotyrosine  
\*1 - 7 homologous peptides

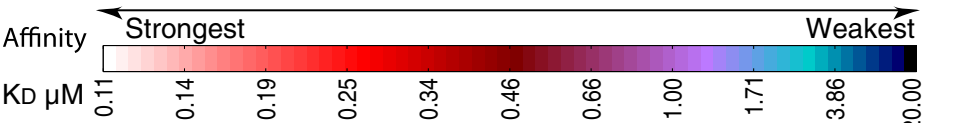

Supplement: S5 (10.1371/journal.pone.0044471.s005) [file journal.pone.0044471.s005.pdf › journal.pone.0044471.s005.pdf]
