# Supplementary material for: Comprehensive Binary Interaction Mapping of SH2 Domains via Fluorescence Polarization Reveals Novel Functional Diversification of ErbB Receptors
Source: PLOS journal article supplement (doi:10.1371/journal.pone.0044471), 2012-09-04
Supplement: S4 (10.1371/journal.pone.0044471.s004) [file journal.pone.0044471.s004.pdf › journal.pone.0044471.s004.pdf]

EGFR

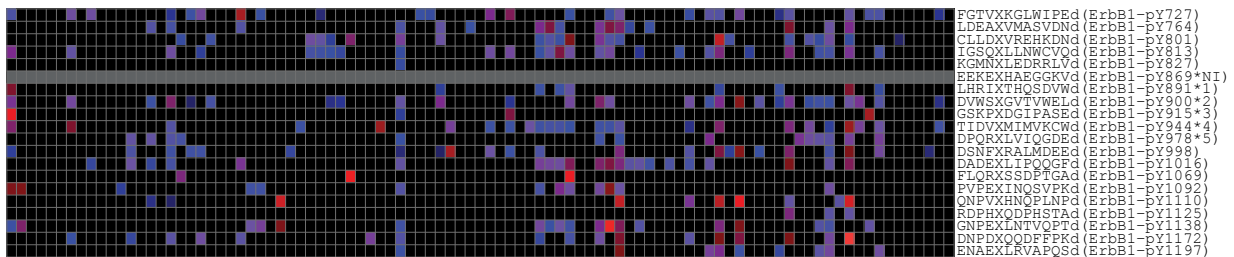

ErbB2

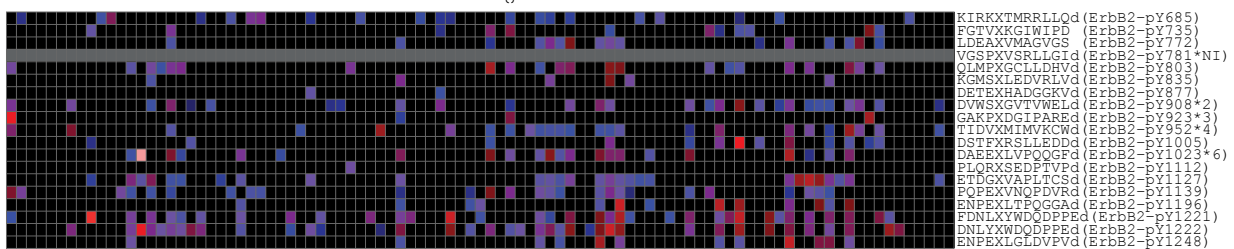

ErbB3

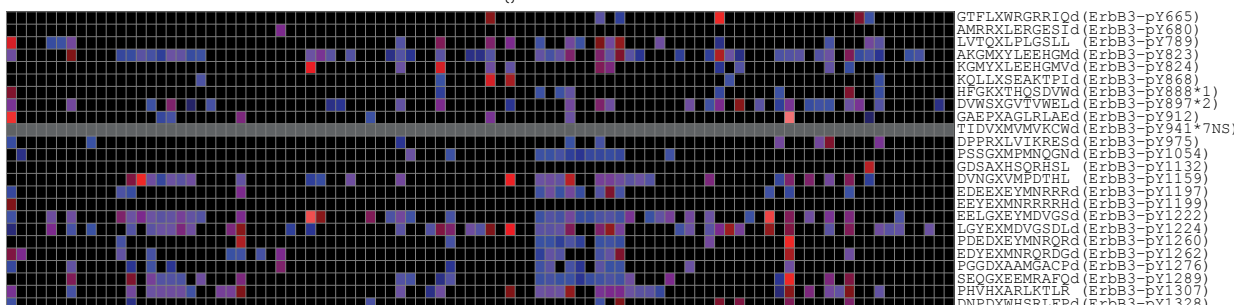

ErbB4

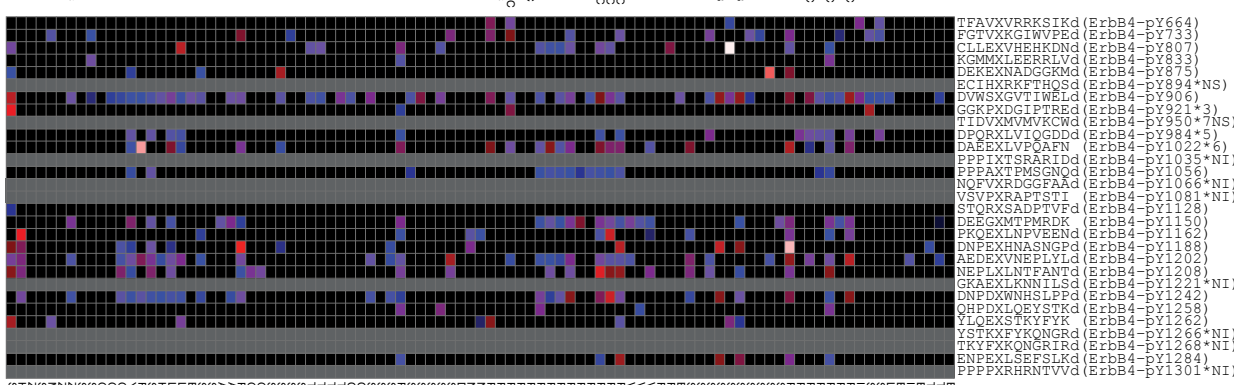

Millipolarization Units

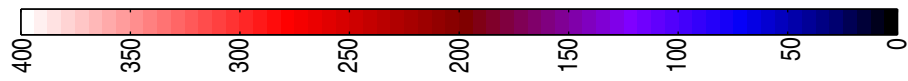

X, pY phosphotyrosine  
 \*1-7 homologous peptides  
 NI: no positive interactions  
 NS: peptide not synthesized
