# Supplementary material for: Comprehensive Binary Interaction Mapping of SH2 Domains via Fluorescence Polarization Reveals Novel Functional Diversification of ErbB Receptors
Source: PLOS journal article supplement (doi:10.1371/journal.pone.0044471), 2012-09-04

A

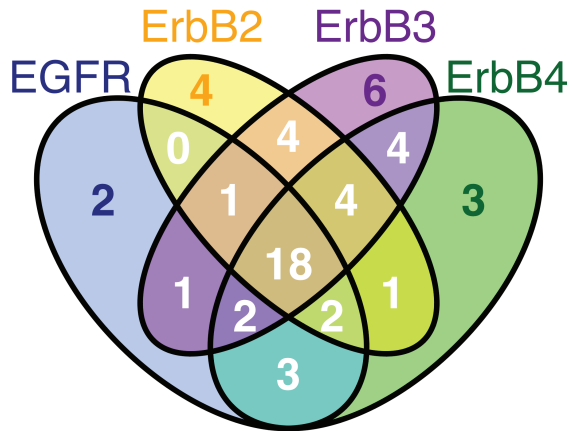

B

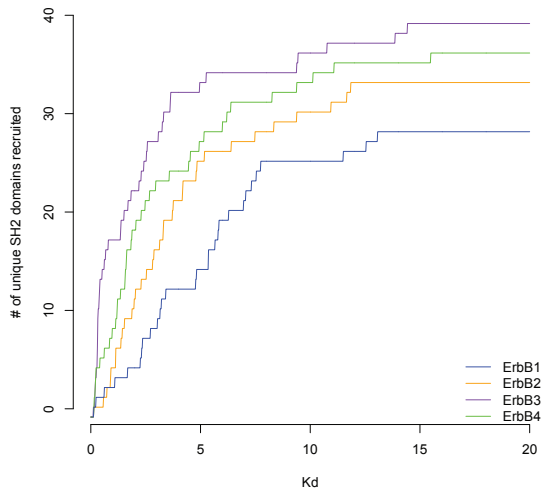

Supplement: S9 (10.1371/journal.pone.0044471.s009) [file journal.pone.0044471.s009.pdf › journal.pone.0044471.s009.pdf]
