# Supplementary material for: Comprehensive Binary Interaction Mapping of SH2 Domains via Fluorescence Polarization Reveals Novel Functional Diversification of ErbB Receptors
Source: PLOS journal article supplement (doi:10.1371/journal.pone.0044471), 2012-09-04

Adaptors

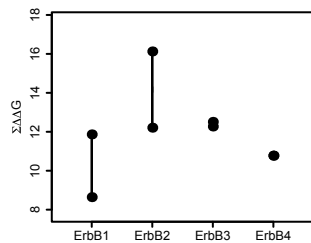

Chromatin Remodeling

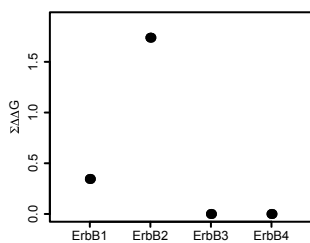

Cytoskeletal Regulation

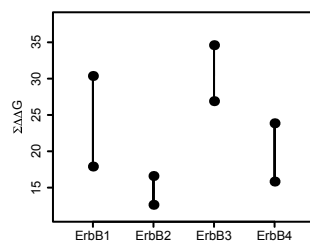

Kinases

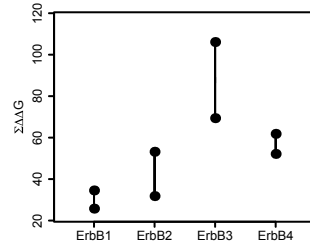

Phosphatases

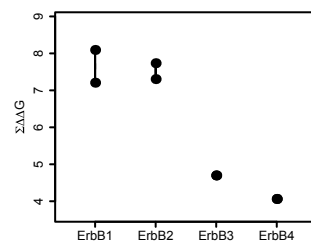

Phosphatidylinositol Kinase

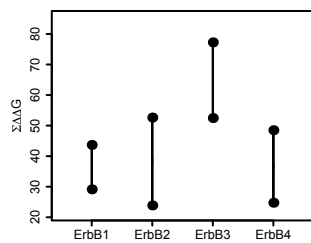

Phosphatidylinositol Phosphatase

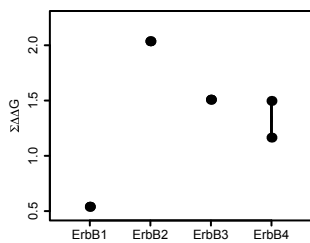

Phospholipases

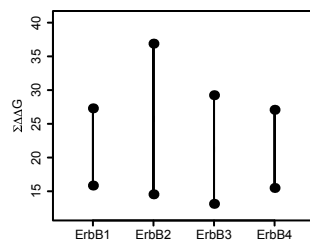

Scaffolds

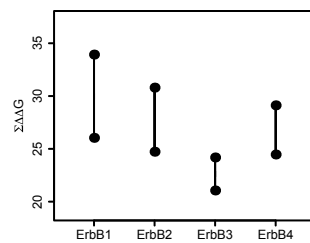

Signal Regulation

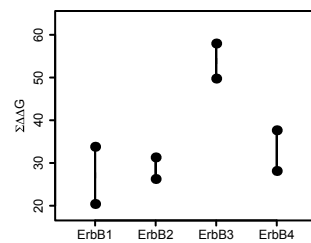

RAS GEFs

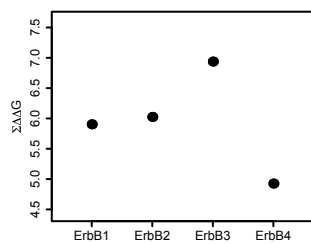

RHO GEFs

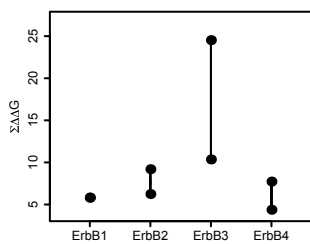

RAS GTPases

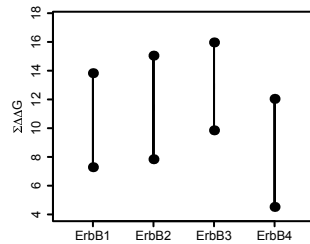

Supplement: S10 (10.1371/journal.pone.0044471.s010) [file journal.pone.0044471.s010.pdf › journal.pone.0044471.s010.pdf]
