# Supplementary material for: Comprehensive Binary Interaction Mapping of SH2 Domains via Fluorescence Polarization Reveals Novel Functional Diversification of ErbB Receptors
Source: PLOS journal article supplement (doi:10.1371/journal.pone.0044471), 2012-09-04

# ERBB2 pY1139

\*PLTCSPQPEXVNQPDVVD-COOH  
-DTT +DTT

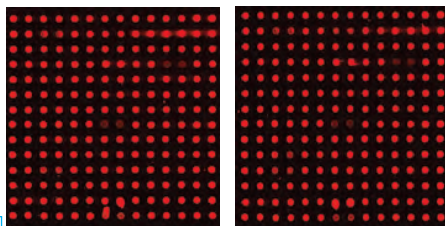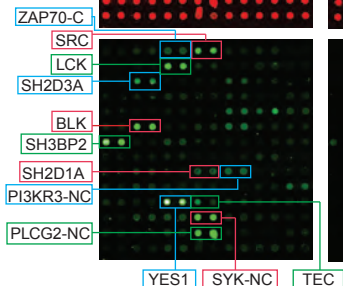

# ERBB4 pY807

\*CLLEXVHEHKDND-COOH  
-DTT +DTT

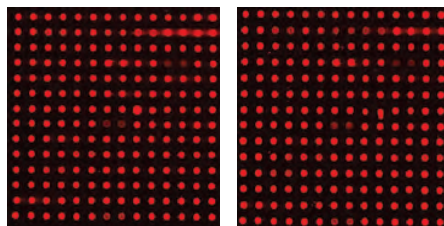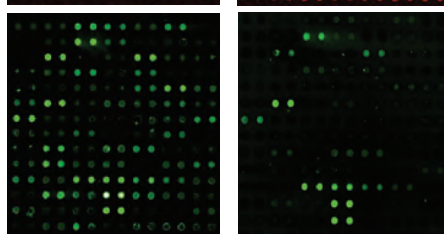

# ERBB2 pY803

\*QLMPXGCLLDHVD-COOH  
-DTT +DTT

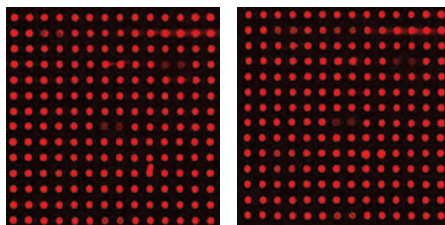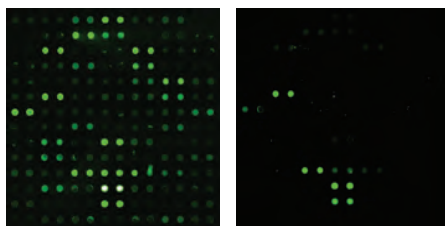

# ERBB2 pY772

\*LDEAXVMAGVGS-COOH  
-DTT +DTT

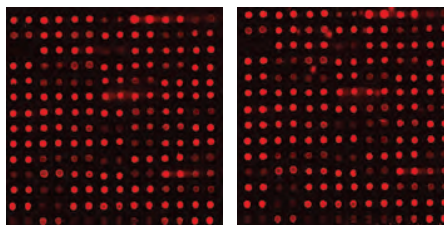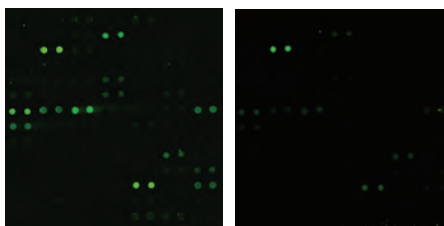

Supplement: S11 (10.1371/journal.pone.0044471.s011) [file journal.pone.0044471.s011.pdf › journal.pone.0044471.s011.pdf]
