# Supplementary material for: Comprehensive Binary Interaction Mapping of SH2 Domains via Fluorescence Polarization Reveals Novel Functional Diversification of ErbB Receptors
Source: PLOS journal article supplement (doi:10.1371/journal.pone.0044471), 2012-09-04
Supplement: S12 (10.1371/journal.pone.0044471.s012) [file journal.pone.0044471.s012.pdf › journal.pone.0044471.s012.pdf]

EGFR

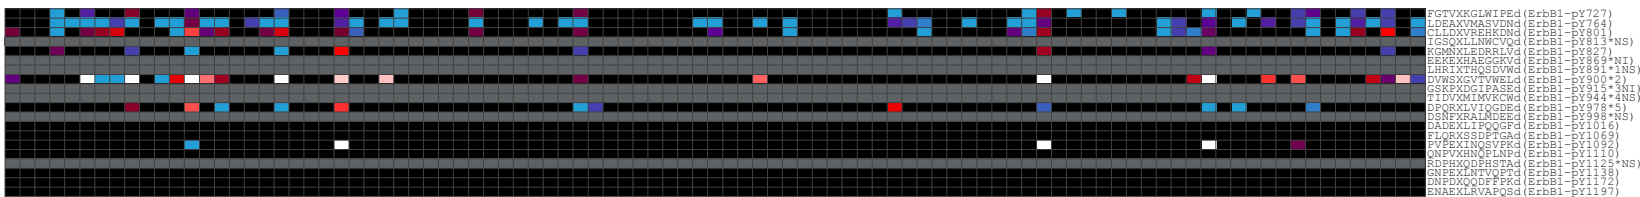

ErbB2

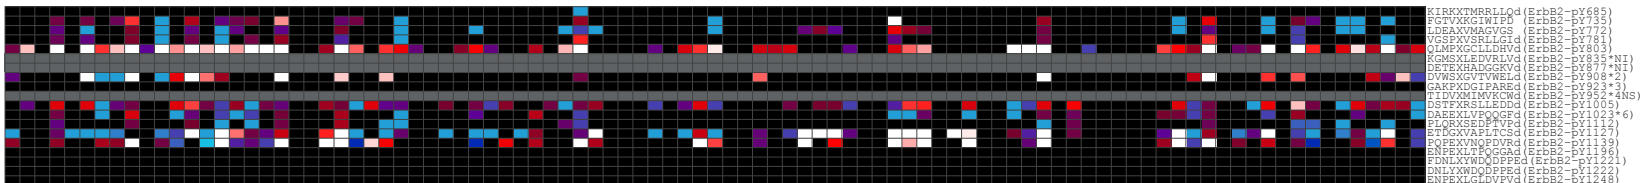

ErbB3

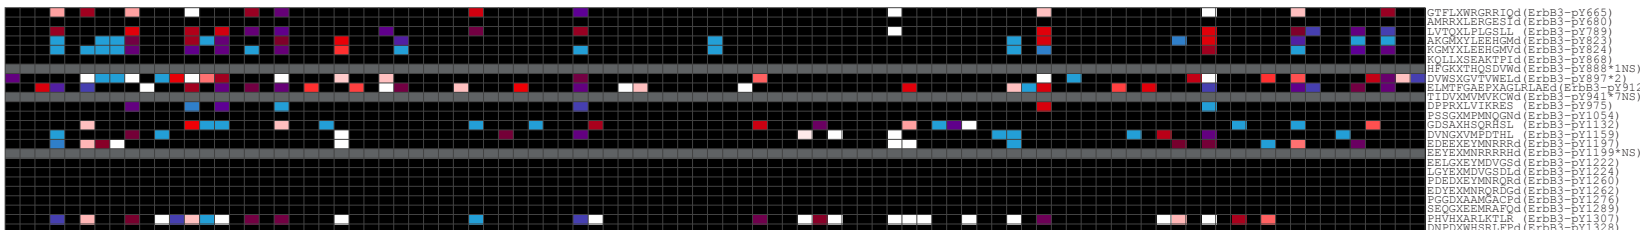

ErbB4

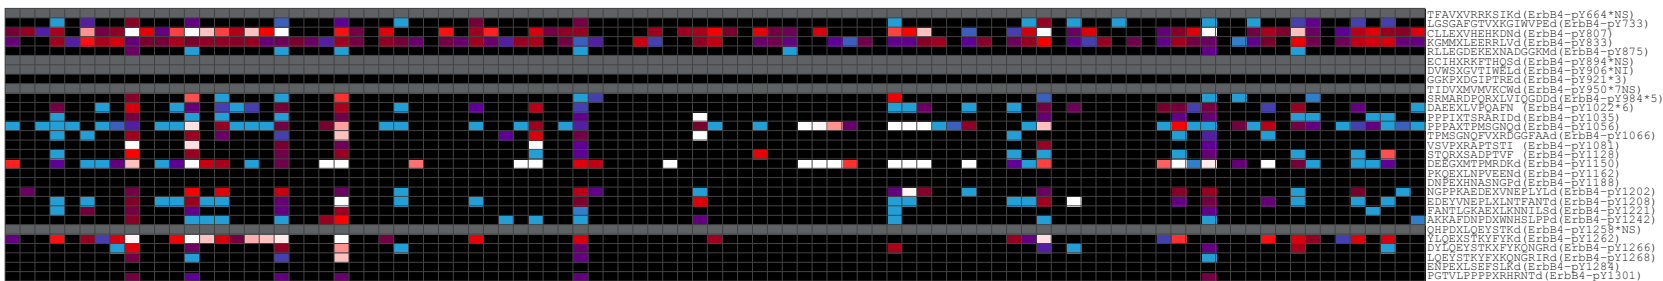

Affinity

Strongest

Weakest

K<sub>D</sub> μM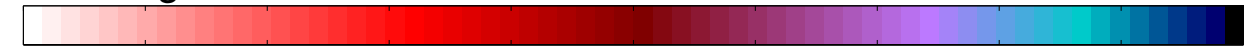

0.11 0.14 0.19 0.25 0.34 0.46 0.66 1.00 1.71 3.86 >20.00

X, pY homophology residue  
 \*1-7 phosphorous peptides  
 \*NI no positive interaction hits  
 \*NS peptide not synthesized
