# Supplementary material for: Comprehensive Binary Interaction Mapping of SH2 Domains via Fluorescence Polarization Reveals Novel Functional Diversification of ErbB Receptors
Source: PLOS journal article supplement (doi:10.1371/journal.pone.0044471), 2012-09-04
Supplement: S13 (10.1371/journal.pone.0044471.s013) [file journal.pone.0044471.s013.pdf › journal.pone.0044471.s013.pdf]

EGFR

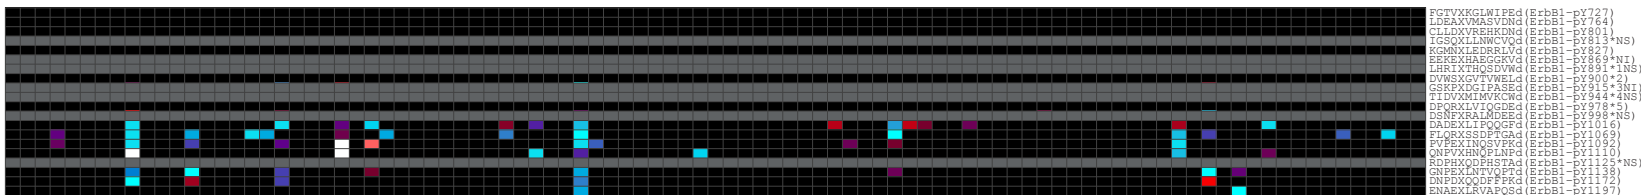

ErbB2

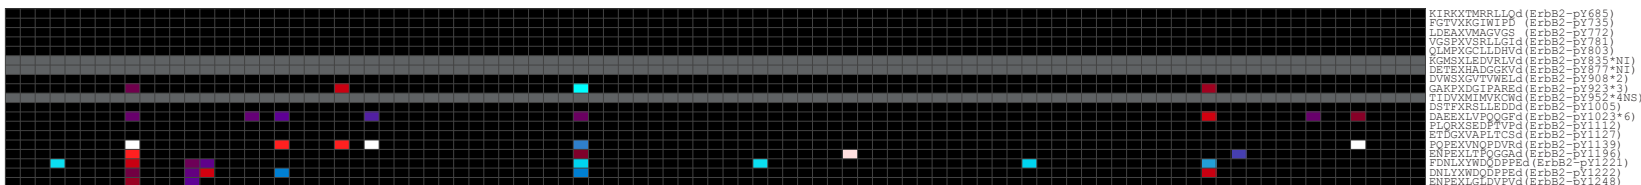

ErbB3

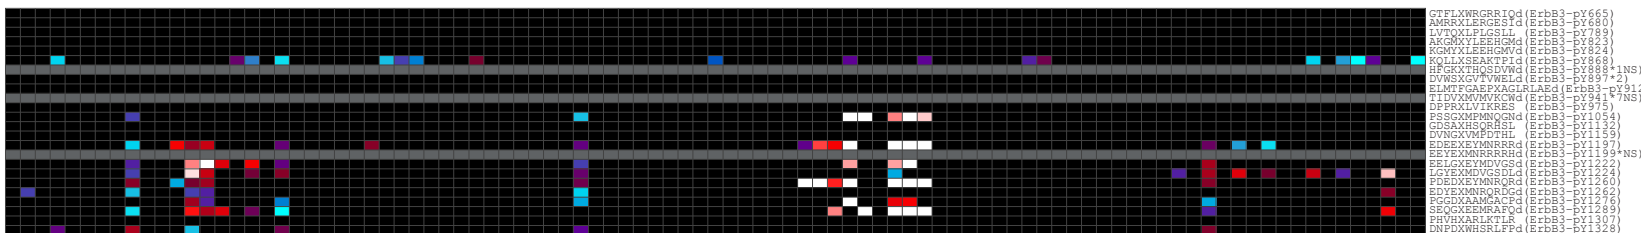

ErbB4

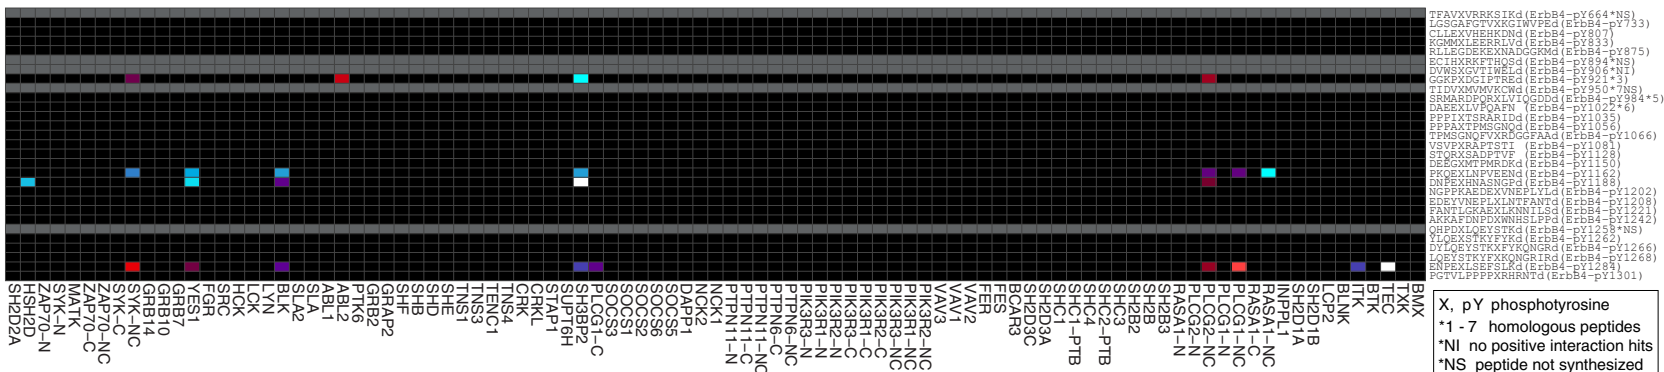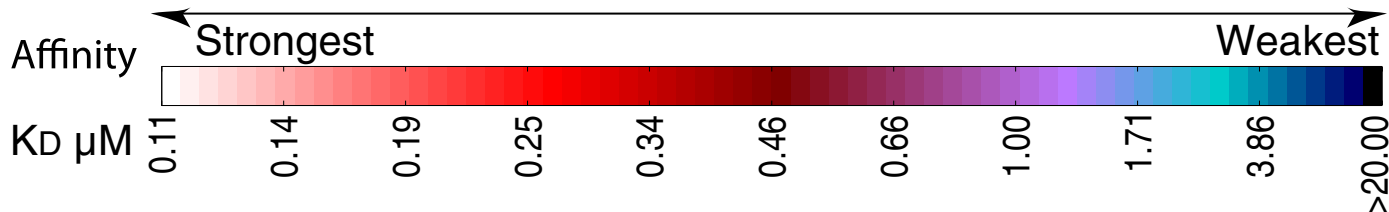

X, pY phosphotyrosine  
 \*1 - 7 homologous peptides  
 \*NI no positive interaction hits  
 \*NS peptide not synthesized
