# Supplementary material for: Comprehensive Binary Interaction Mapping of SH2 Domains via Fluorescence Polarization Reveals Novel Functional Diversification of ErbB Receptors
Source: PLOS journal article supplement (doi:10.1371/journal.pone.0044471), 2012-09-04
Supplement: S14 (10.1371/journal.pone.0044471.s014) [file journal.pone.0044471.s014.pdf › journal.pone.0044471.s014.pdf]

## EGFR

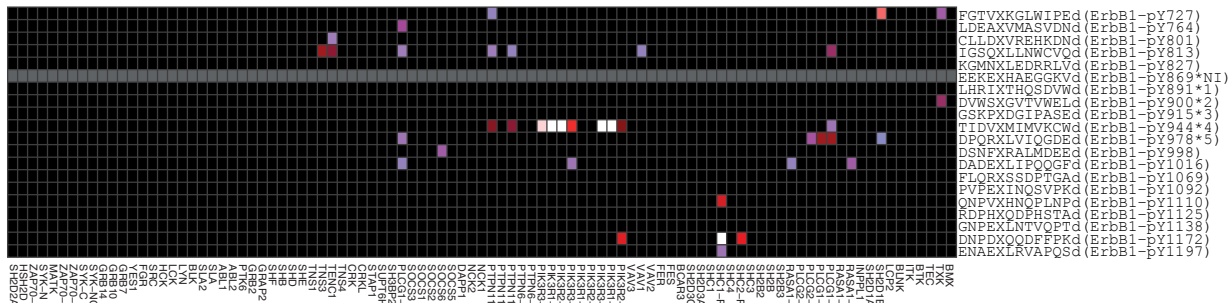

## ErbB2

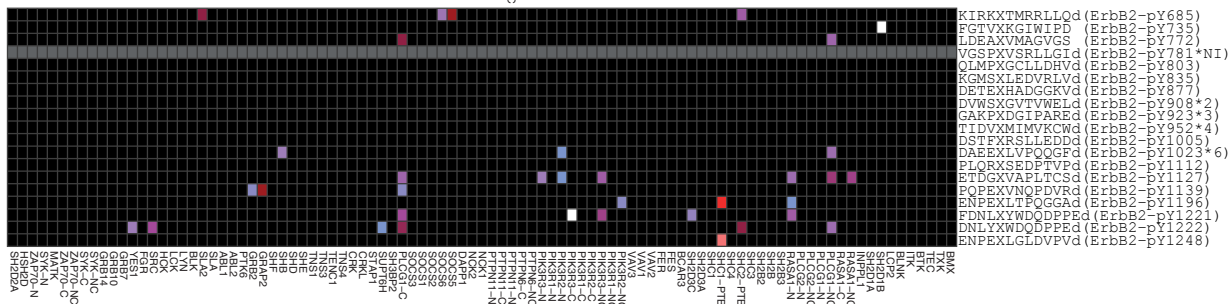

## ErbB3

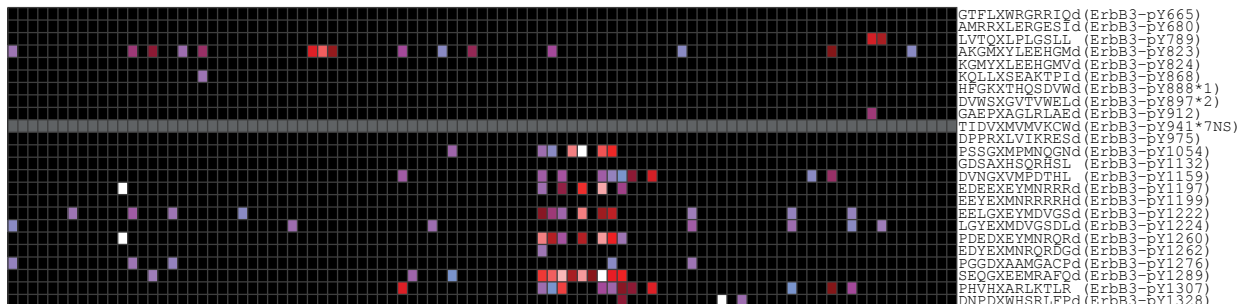

## ErbB4

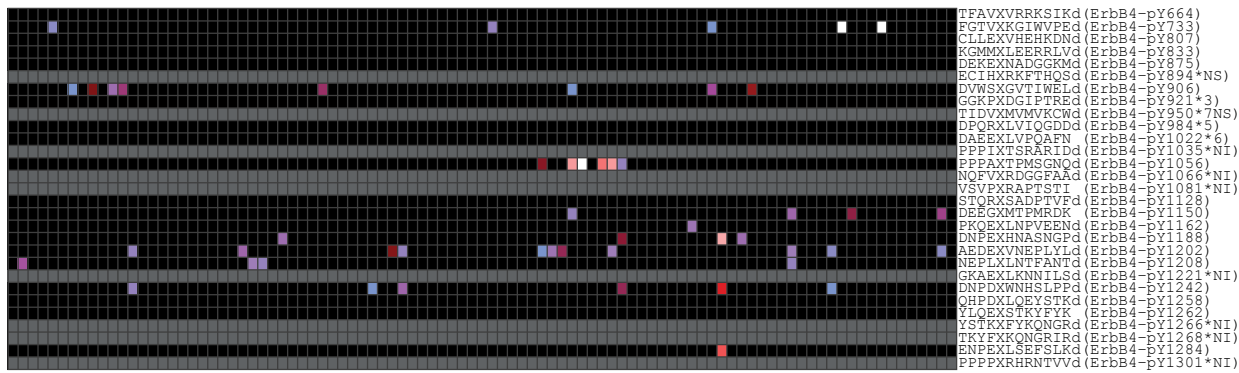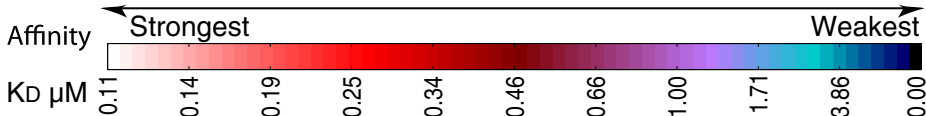

X, pY phosphorytisine  
 \*1-7 homologous peptides  
 \*NI no positive interaction hits  
 \*NS peptide not synthesized
