# Supplementary material for: Comprehensive Binary Interaction Mapping of SH2 Domains via Fluorescence Polarization Reveals Novel Functional Diversification of ErbB Receptors
Source: PLOS journal article supplement (doi:10.1371/journal.pone.0044471), 2012-09-04

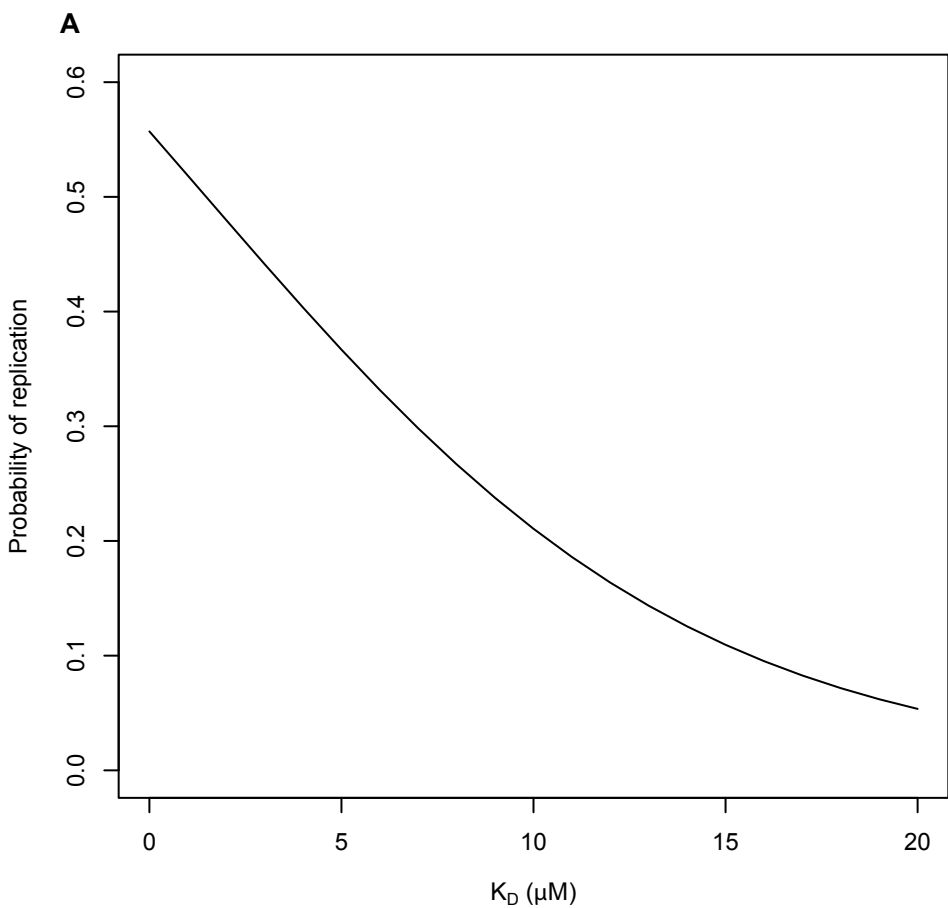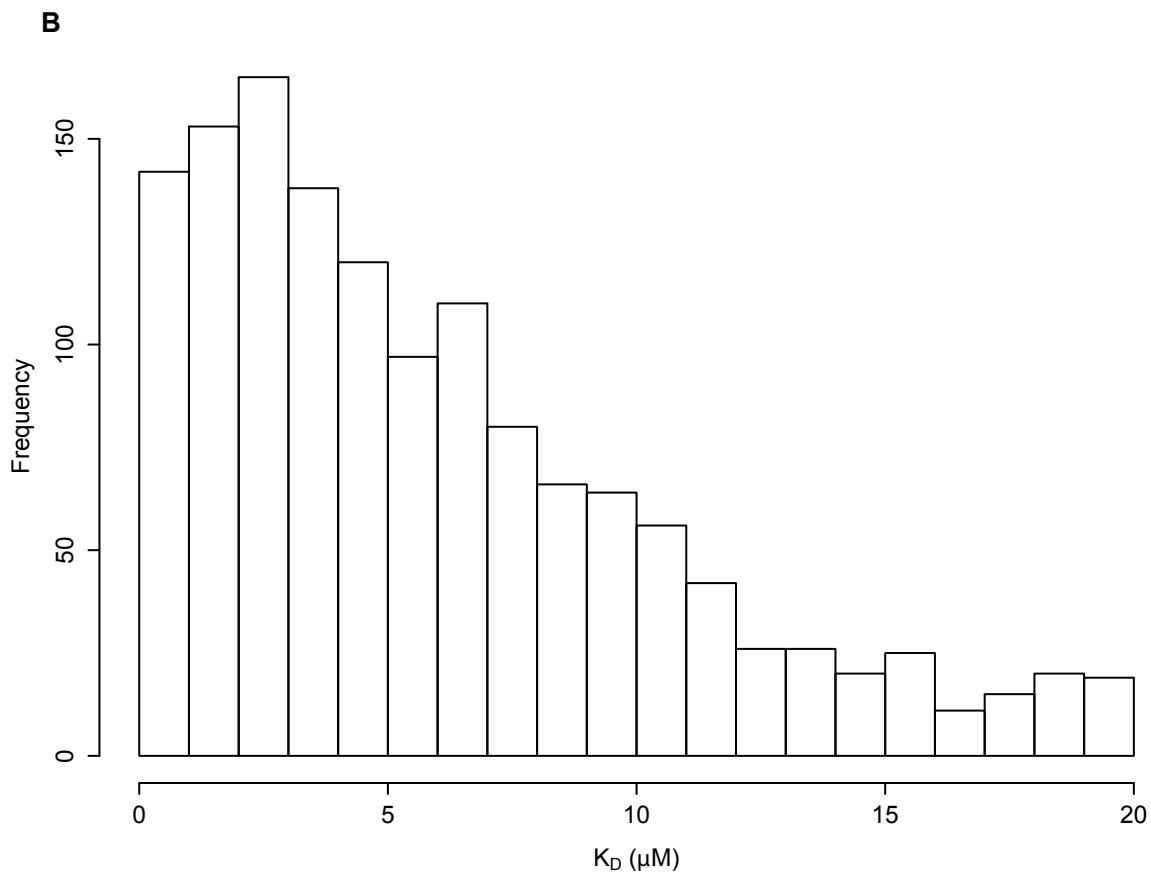

Supplement: S15 (10.1371/journal.pone.0044471.s015) [file journal.pone.0044471.s015.pdf › journal.pone.0044471.s015.pdf]
