# Supplementary material for: Comprehensive Binary Interaction Mapping of SH2 Domains via Fluorescence Polarization Reveals Novel Functional Diversification of ErbB Receptors
Source: PLOS journal article supplement (doi:10.1371/journal.pone.0044471), 2012-09-04

# EGFR

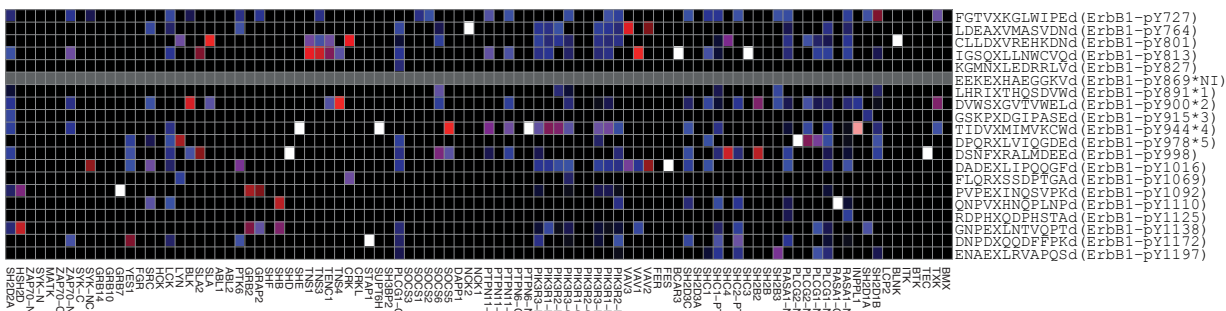

## ErbB2

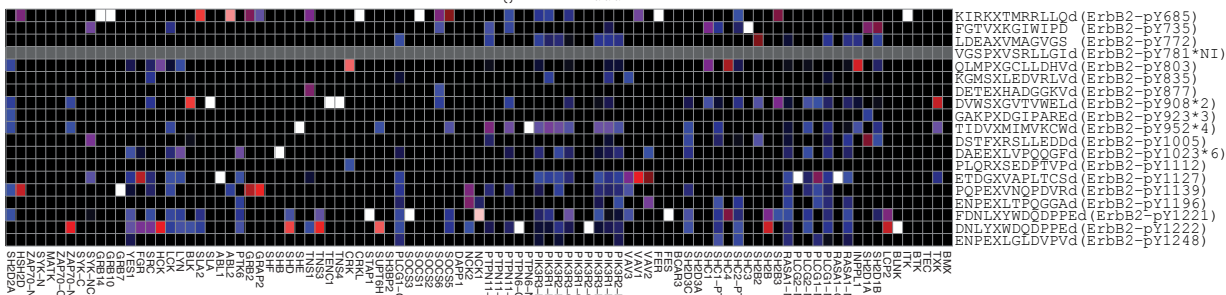

ErbB3

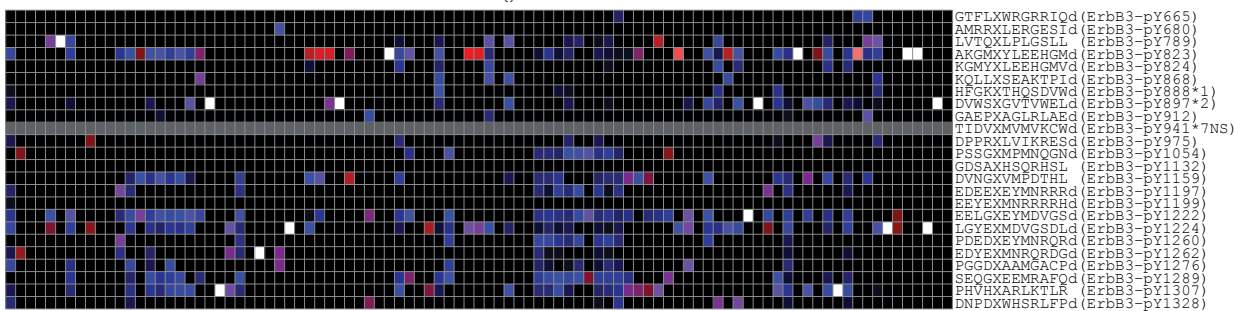

# ErbB4

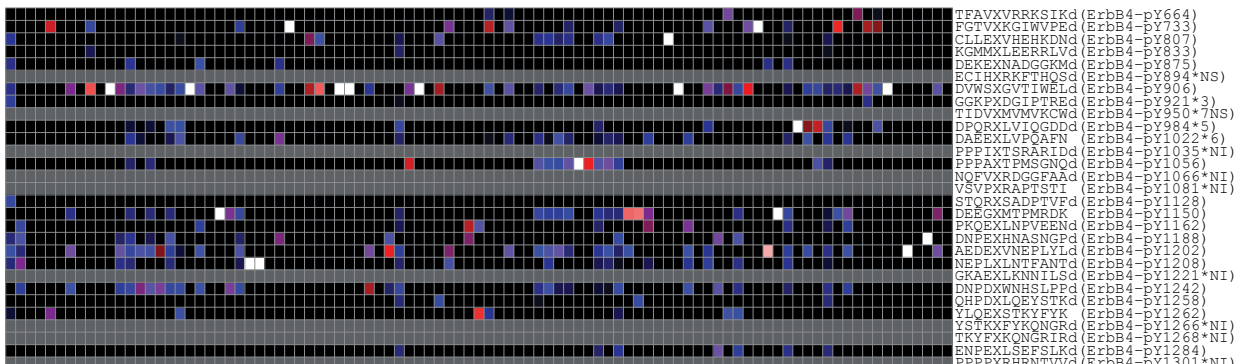

X, pY phosphotyrosine  
\*1 -7 homologous peptides  
\*NI no positive interaction hits  
\*NS peptide not synthesized

SH2 binding activity by receptor site (%)

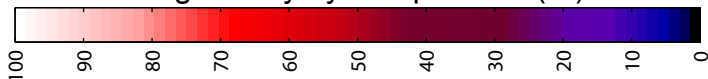

Supplement: S16 (10.1371/journal.pone.0044471.s016) [file journal.pone.0044471.s016.pdf › journal.pone.0044471.s016.pdf]
