# Supplementary material for: Comprehensive Binary Interaction Mapping of SH2 Domains via Fluorescence Polarization Reveals Novel Functional Diversification of ErbB Receptors
Source: PLoS One. 2012 Sep 4;7(9):e44471. doi: 10.1371/journal.pone.0044471 (PMC3433420; doi:10.1371/journal.pone.0044471)
Supplement: Table S12 — In-house protein microarray replicate assays. (XLSX) [file pone.0044471.s028.xlsx]

## Sheet: ErbB2 pY735
Supplementary Table 12: in-house protein array replicate assays
Protein	Fmax	Kd (uM)	R2	PM Assay Replicate #	Array Fabrication #
ABL2	5616.04	1.01501	0.982194	39335	39329
BLK	17073.7	0.80263	0.97237	39331	39329
BLK	51073.7	0.800864	0.923816	39335	39329
BLK	41798.2	0.511279	0.962556	39602	39442
BLNK	27047.4	46.752	0.990219	39335	39329
BTK	33073.7	1.52805	0.759151	39331	39329
HCK	1946.23	0.888009	0.991374	39335	39329
ITK	1872.38	2.03024	0.97724	39331	39329
ITK	24741.6	29.3946	0.980414	39335	39329
LCK	25073.7	0.731279	0.983477	39331	39329
LCK	25510.5	11.859	0.988554	39335	39329
NCK1	4582.07	5.29277	0.976967	39335	39329
PIK3R2-NC	1695.69	1.47244	0.99	39335	39329
PIK3R3-NC	2413.95	0.00080545	0.931357	39331	39329
PIK3R3-NC	2729.85	1.01326	0.960667	39335	39329
PLCG2-NC	6455.07	0.576629	0.940999	39331	39329
PLCG2-NC	31073.7	2.89821	0.788732	39335	39329
PLCG2-NC	36788.6	1.0126	0.974469	39602	39442
PTK6	17073.7	0.801465	0.96073	39331	39329
PTPN6-NC	3586.66	5.42175	0.99	39335	39329
RASA1-N	2816.92	3.46063	0.99304	39335	39329
RASA1-NC	42328.5	81.9163	0.988501	39335	39329
SH2D1A	36073.7	0.747512	0.97991	39331	39329
SH2D1A	11355	1.63444	0.930588	39335	39329
SH2D1A	21978.3	1.02069	0.168963	39602	39442
SH2D1B	4233.89	1.1694	0.980156	39331	39329
SH2D1B	40295.2	0.0448403	0.848496	39602	39442
SH2D3A	3924.71	0.7727	0.950811	39331	39329
SH2D3A	21073.7	1.19796	0.937314	39335	39329
SH2D3C	16715.8	27.378	0.728675	39335	39329
SH3BP2	52504.7	3.86173	0.99	39331	39329
SH3BP2	22147.5	1.602	0.897237	39335	39329
SH3BP2	40804.2	0.634384	0.798859	39602	39442
SHF	2826.92	0.933267	0.808342	39331	39329
SHF	7894.43	4.39033	0.970339	39335	39329
SRC	25073.7	1.20838	0.961107	39331	39329
SRC	12676.1	1.2122	0.951421	39335	39329
SYK-C	24949.7	0.910348	0.968602	39331	39329
SYK-N	41073.7	0.80103	0.979138	39331	39329
SYK-N	11947.7	3.0338	0.985276	39335	39329
SYK-NC	29073.7	0.589753	0.972773	39331	39329
SYK-NC	10073.7	0.804522	0.916521	39335	39329
SYK-NC	45872.9	0.0487666	0.458	39602	39442
TEC	11040.2	3.21832	0.939773	39331	39329
TEC	16975.1	8.69592	0.99	39335	39329
TNS1	21073.7	1.60225	0.741898	39331	39329
YES1	14881.3	0.52599	0.947528	39331	39329
YES1	11573.7	1.60448	0.97174	39335	39329
YES1	34380.5	2.34561	0.487409	39602	39442
ZAP70-C	17073.7	0.812299	0.951085	39331	39329
ZAP70-C	11933.2	19.9729	0.99481	39335	39329

## Sheet: ErbB2 pY1112
Supplementary Table 12: in-house protein array replicate assays
Protein	Fmax	Kd (uM)	R2	PM Assay Replicate #	Array Fabrication #
ABL2	1173.32	1.84305	0.99	39336	39329
BLK	48465.7	3.22418	0.89929	39331	39329
BLK	8073.74	1.17192	0.948907	39336	39329
BLK	22166	2.07	0.982798	39603	39392
BLNK	5579.83	4.90272	0.974506	39331	39329
GRAP2	5129.56	7.15285	0.991808	39331	39329
ITK	38438.8	52.8865	0.89136	39331	39329
LCK	13332.1	10.302	0.964998	39331	39329
LCK	4118.69	8.92929	0.958835	39336	39329
PLCG2-NC	15640.3	5.52783	0.912094	39331	39329
PLCG2-NC	1395.9	0.934546	0.972685	39336	39329
RASA1-C	2.38904e+12	1.49193e+09	0.883723	39331	39329
SH2D1A	5769.07	1.71807	0.937619	39331	39329
SH2D1A	5183.95	9.66573	0.98021	39336	39329
SH2D1B	2863	2.03311	0.985232	39331	39329
SH2D1B	1051.35	5.39426	0.994199	39336	39329
SH2D1B	3436.54	0.49	0.99	39603	39392
SH2D3A	78926.3	26.5779	0.963952	39331	39329
SH3BP2	6.44789e+14	1.29474e+11	0.880322	39331	39329
SHC1	2491.52	1.25867	0.984108	39331	39329
SHC1	795.442	3.05618	0.864301	39336	39329
SHF	4962.27	2.9683	0.962348	39331	39329
SRC	171137	183.207	0.97163	39331	39329
STAP1	4220.4	0.05	0.95019	39603	39392
SUPT6H	1876.86	1.03802	0.952072	39331	39329
SYK-N	11329.4	3.61673	0.982208	39331	39329
SYK-N	5963.47	14.5821	0.975218	39336	39329
SYK-NC	64875.6	0.893205	0.915175	39331	39329
SYK-NC	18073.7	0.802569	0.9239	39336	39329
TEC	43488.6	26.5261	0.859561	39331	39329
TEC	1653.8	5.06766	0.956242	39336	39329
YES1	44991.5	0.720367	0.9815	39331	39329
YES1	22073.7	1.60243	0.942455	39336	39329

## Sheet: ErbB2 pY1127
Supplementary Table 12: in-house protein array replicate assays
Protein	Fmax	Kd (uM)	R2	PM Assay Replicate #	Array Fabrication #
ABL1	1701.33	0.528928	0.945662	39337	39329
ABL1	3547.57	0.300693	0.905188	39336	39329
ABL2	4320.99	0.0170477	0.966253	39337	39329
ABL2	13472	0.0146218	0.939254	39336	39329
BCAR3	898.5	0.725791	0.96628	39337	39329
BLK	31073.7	3.20156	0.981657	39336	39329
BLK	64973.5	2	0.964231	39603	39392
BLK	2627.45	0.456895	0.938144	39337	39329
BLNK	2782.09	1.95226	0.993906	39337	39329
BLNK	5626.18	1.25473	0.954343	39336	39329
BMX	3828.05	5.38657	0.993906	39337	39329
BMX	17073.7	1.60272	0.978701	39336	39329
BTK	7127.41	4.71013	0.972297	39337	39329
BTK	9824.58	5.891	0.964213	39336	39329
CRK	5822.03	7.71391	0.924389	39336	39329
CRKL	2445.2	0.640942	0.943405	39337	39329
CRKL	16358.9	4.80112	0.920699	39336	39329
DAPP1	2157.74	2.66961	0.984895	39337	39329
FGR	21449.4	5.17794	0.970918	39336	39329
GRAP2	23043.1	19.4488	0.899856	39336	39329
GRB10	3247.42	1.90188	0.98365	39337	39329
GRB10	14073.7	2.33698	0.899401	39336	39329
GRB7	15073.7	1.60372	0.941815	39336	39329
GRB7	3883.91	2.53322	0.917522	39337	39329
HCK	1501.58	0.252024	0.962987	39337	39329
HCK	3898.96	4.3617	0.907266	39336	39329
ITK	26073.7	0.801426	0.977016	39336	39329
ITK	6804.9	2.58292	0.945019	39337	39329
LCK	8524.67	1.60769	0.959081	39337	39329
LCK	26073.7	0.801306	0.936968	39336	39329
LCK	11243.1	0.13	0.896072	39603	39392
LYN	4513.91	1.49529	0.993906	39337	39329
LYN	7673.74	1.20293	0.99	39336	39329
MATK	5170.23	4.40185	0.920108	39336	39329
NCK1	20280.1	6.85255	0.905652	39336	39329
NCK2	3835.45	0.459022	0.923969	39337	39329
NCK2	16073.7	1.56414	0.887295	39336	39329
PIK3R1-N	683.309	0.22482	0.947627	39337	39329
PIK3R1-N	1196.25	0.0189564	0.923269	39336	39329
PIK3R1-NC	3784.39	0.0109206	0.987035	39337	39329
PIK3R1-NC	3334.21	0.01	0.937748	39603	39392
PIK3R2-N	1187.72	0.151175	0.955793	39337	39329
PIK3R2-N	2261.18	0.0392413	0.940781	39336	39329
PIK3R2-NC	3515.88	0.0105533	0.993906	39337	39329
PIK3R2-NC	8852.52	0.00466453	0.922691	39336	39329
PIK3R3-C	2409.42	2.04491	0.979919	39337	39329
PIK3R3-C	7104.32	1.21029	0.94982	39336	39329
PIK3R3-N	2079.56	0.00697561	0.967839	39336	39329
PIK3R3-N	616.504	0.0757993	0.944141	39337	39329
PIK3R3-NC	7855.85	0.0151072	0.965568	39337	39329
PIK3R3-NC	7834.02	0.05	0.955513	39603	39392
PIK3R3-NC	27852.5	0.0990067	0.908963	39336	39329
PLCG1-C	2673.25	0	0.942734	39603	39392
PLCG1-C	494.68	0.107168	0.941827	39337	39329
PLCG1-C	6513.09	4.0904	0.916194	39336	39329
PLCG1-NC	1910.1	1.92255	0.957847	39337	39329
PLCG1-NC	14990.5	8.82437	0.954506	39336	39329
PLCG2-N	3062.82	4.16105	0.993906	39337	39329
PLCG2-NC	18073.7	0.578004	0.966255	39337	39329
PLCG2-NC	51073.7	1.6008	0.918031	39336	39329
PTK6	4587.02	4.17998	0.93802	39337	39329
PTK6	4751.27	1.56851	0.745497	39336	39329
PTPN11-NC	2516.85	1.14987	0.983787	39337	39329
PTPN11-NC	6439.95	1.5287	0.923985	39336	39329
PTPN6-NC	6876.62	1.61578	0.959897	39337	39329
PTPN6-NC	19073.7	1.61658	0.95008	39336	39329
RASA1-C	6.23077e+12	5.63942e+09	0.973025	39336	39329
RASA1-C	2079.62	1.21257	0.968626	39337	39329
RASA1-N	14492.8	0.592618	0.961626	39336	39329
RASA1-N	4163.45	0.113061	0.917704	39337	39329
RASA1-NC	20319.4	0.115705	0.962213	39336	39329
RASA1-NC	5696.49	0.06	0.949665	39603	39392
RASA1-NC	7161.16	0.0306375	0.933665	39337	39329
SH2B3	2991.95	1.38223	0.970809	39337	39329
SH2B3	15073.7	2.30083	0.967433	39336	39329
SH2D1A	46073.7	1.60084	0.951357	39336	39329
SH2D1A	13311.8	4.59346	0.944138	39337	39329
SH2D1B	2482.94	2.28186	0.956712	39337	39329
SH2D1B	1.28232e+07	11219.2	0.90455	39336	39329
SH2D2A	2448.2	2.75258	0.974697	39337	39329
SH2D3A	43926.3	0.149177	0.965815	39336	39329
SH2D3A	17710.1	1.14944	0.899397	39337	39329
SH2D3C	3887.75	5.51283	0.993906	39337	39329
SH2D3C	13073.7	1.51911	0.989627	39336	39329
SH3BP2	25929.5	1.13961	0.983326	39337	39329
SH3BP2	46147.5	2.86133	0.929846	39336	39329
SHC1	1953.28	0.81994	0.987776	39337	39329
SHC1	3605.58	0.978318	0.915933	39336	39329
SHE	7.05695e+11	1.10238e+09	0.897873	39336	39329
SHF	3369.43	1.02114	0.907847	39337	39329
SOCS5	1163.1	0.69785	0.917731	39337	39329
SOCS6	3628.64	8.92645	0.963858	39337	39329
SOCS6	13330.1	5.19913	0.951878	39336	39329
SRC	7172.31	0.25	0.985943	39603	39392
SRC	32842.7	0.0349783	0.978394	39336	39329
SRC	6355.2	0.380591	0.92486	39337	39329
SYK-C	3852.61	1.91561	0.990799	39337	39329
SYK-C	19073.7	2.38737	0.918034	39336	39329
SYK-N	5573.74	3.21212	0.877764	39337	39329
SYK-N	20699.4	2.32646	0.786369	39336	39329
SYK-NC	31073.7	1.2996	0.984956	39336	39329
SYK-NC	7054.69	0.956677	0.9474	39337	39329
TEC	7609.78	0.25	0.979494	39603	39392
TEC	3876.4	0.0407896	0.928906	39337	39329
TEC	31073.7	1.60123	0.908558	39336	39329
TENC1	48440.9	32.5928	0.94274	39336	39329
TENC1	3453.98	3.94199	0.939721	39337	39329
TNS3	7649.62	5.96029	0.978959	39337	39329
VAV1	3967.05	0.186334	0.953583	39336	39329
VAV1	911.062	0.091614	0.938506	39337	39329
VAV2	2812.73	0.17376	0.934017	39337	39329
VAV2	21073.7	1.58844	0.9241	39336	39329
YES1	14807.1	0.00530093	0.925979	39336	39329
YES1	4929.48	0.0651337	0.808798	39337	39329
ZAP70-C	10198.7	2.19697	0.993906	39337	39329
ZAP70-C	26073.7	3.2137	0.906697	39336	39329
ZAP70-NC	4615.93	2.00529	0.993906	39337	39329
ZAP70-NC	21804.7	2.40563	0.9613	39336	39329

## Sheet: ErbB3 pY789
Supplementary Table 12: in-house protein array replicate assays
Protein	Fmax	Kd (uM)	R2	PM Assay Replicate #	Array Fabrication #
BLK	16161	2.25032	0.986144	39331	39329
BLK	7160.69	1.29646	0.980295	39334	39329
BLK	45919.4	0.03	0.854717	39603	39392
GRAP2	17407.1	1.30879	0.993236	39331	39329
GRB7	41495.9	1.19	0.994887	39603	39392
ITK	19073.7	1.16418	0.97036	39331	39329
LCK	28394.1	0.55	0.990502	39603	39392
LCK	24073.7	1.13897	0.955953	39334	39329
LCK	31073.7	1.11902	0.925289	39331	39329
PIK3R3-NC	35293.8	0.38	0.983738	39603	39392
PIK3R3-NC	26246	6.77065	0.958852	39331	39329
PIK3R3-NC	10821	0.0645432	0.957071	39334	39329
PLCG1-NC	23007.7	0.38	0.992223	39603	39392
PLCG2-NC	37708.8	0.801012	0.983143	39334	39329
PLCG2-NC	4812.62	0.387907	0.953562	39331	39329
PLCG2-NC	45503.2	0.08	0.852758	39603	39392
SH2D1A	45672.5	0.22	0.978969	39603	39392
SH2D1A	5289.33	2.68047	0.973	39331	39329
SH2D1A	22073.7	0.678405	0.931454	39334	39329
SH2D1B	37931.2	1.82929	0.994887	39331	39329
SH2D1B	11073.7	1.6043	0.993183	39334	39329
SH2D1B	50951.2	0.07	0.953122	39603	39392
SH2D3A	43171.3	0.17	0.981043	39603	39392
SH2D3A	31073.7	0.401139	0.961591	39331	39329
SH2D3A	21073.7	0.401639	0.917971	39334	39329
SH3BP2	16073.7	0.587823	0.970475	39331	39329
SH3BP2	49384.1	0.05	0.932724	39603	39392
SH3BP2	16147.5	2.45742	0.91442	39334	39329
SRC	29075.3	1.84925	0.994887	39331	39329
SRC	9073.74	0.423789	0.950663	39334	39329
SYK-N	23073.7	0.60886	0.985019	39334	39329
SYK-N	47056.9	1.33148	0.977637	39331	39329
SYK-NC	41780.8	0.783838	0.990118	39331	39329
SYK-NC	24073.7	0.401447	0.965564	39334	39329
SYK-NC	48333.5	0.01	0.836355	39603	39392
TEC	20384	1.66184	0.981439	39334	39329
TNS3	19073.7	0.801574	0.968383	39331	39329
YES1	19977.6	1.43634	0.980895	39334	39329
YES1	12783.4	0.517567	0.97983	39331	39329
YES1	41613.9	0.06	0.867558	39603	39392

## Sheet: ErbB3 pY1132
Supplementary Table 12: in-house protein array replicate assays
Protein	Fmax	Kd (uM)	R2	PM Assay Replicate #	Array Fabrication #
BLK	4480.27	0.199317	0.976439	39331	39329
FES	19073.7	3.20269	0.899602	39331	39329
GRB7	7130.59	0.01	0.797932	39625	39615
PIK3R3-NC	4856.64	0.00772979	0.984689	39331	39329
PLCG2-NC	6678.48	1.18603	0.98602	39331	39329
RASA1-N	32689.6	5.15	0.98602	39625	39615
SH3BP2	3.41731e+12	4.15056e+09	0.945955	39336	39329
SH3BP2	18926.3	6.39759	0.870733	39331	39329
SYK-N	12073.7	2.40258	0.96384	39331	39329
SYK-NC	23165.1	0.784749	0.954663	39331	39329
SYK-NC	13495	4.98129	0.909071	39336	39329
TNS1	3341.78	0.00143854	0.756151	39331	39329
YES1	2343.03	0.735494	0.949842	39336	39329
YES1	38073.7	2.2563	0.896424	39331	39329

## Sheet: ErbB4 pY733 (18-mer)
Protein	Fmax	Kd (uM)	R2	PM Assay Replicate #	Array Fabrication #
ABL2	5230.5	1.36888	0.973189	39335	39329
ABL2	5707.35	1.73315	0.960741	39334	39329
ABL2	5397.18	0.268398	0.952126	39307	39320
BLK	6138.38	1.74511	0.974499	39335	39329
BLK	15786.9	7.17794	0.967416	39334	39329
BLK	51073.7	0.400714	0.959813	39307	39320
GRAP2	6092.04	0.851822	0.9641	39307	39320
				39334	39329
				39334	39329
				39334	39329
				39334	39329
				39334	39329
				39334	39329
				39334	39329
				39334	39329
GRB10	6452.11	1.2682	0.94629	39307	39320
HSH2D	8363.63	2.2114	0.985615	39307	39320
ITK	23787.6	9.6275	0.994344	39334	39329
ITK	7073.74	1.60585	0.95503	39335	39329
ITK	4549.55	0.813908	0.947209	39307	39320
LCK	17337.2	1.24281	0.914065	39307	39320
NCK1	3675.87	0.724301	0.961171	39307	39320
PIK3R1-C	2210.09	0.437712	0.982129	39307	39320
PIK3R3-NC	23713.5	7.82379	0.908101	39334	39329
PIK3R3-NC	28173.9	10.5208	0.890479	39335	39329
PLCG2-NC	41073.7	0.800997	0.99	39307	39320
PLCG2-NC	77644.1	10.308	0.938004	39334	39329
PLCG2-NC	29073.7	2.25833	0.914546	39335	39329
PTPN11-NC	1834.01	0.177187	0.79113	39307	39320
RASA1-C	12198.7	10.4017	0.956629	39334	39329
RASA1-N	3862.4	0.685075	0.957485	39307	39320
SH2B3	9101.46	1.17738	0.936857	39307	39320
SH2D1A	12947.6	0.822686	0.961138	39307	39320
SH2D1A	15411.2	1.60573	0.961039	39334	39329
SH2D1A	15268.2	1.68199	0.957703	39335	39329
SH2D1B	9073.74	0.404312	0.97922	39307	39320
SH2D1B	10750.6	1.28098	0.950732	39334	39329
SH2D1B	10534	1.34083	0.943651	39335	39329
SH2D3A	21073.7	0.60284	0.982359	39335	39329
SH2D3A	21073.7	0.789572	0.971199	39334	39329
SH2D3A	22920.2	0.911617	0.909918	39307	39320
SH2D3C	10080	9.36478	0.985813	39334	39329
SH3BP2	183299	50.1223	0.99	39307	39320
SH3BP2	121214	12.8073	0.911636	39334	39329
SH3BP2	15073.7	0.802372	0.892529	39335	39329
SHC1	8775.35	5.97815	0.939719	39335	39329
SHC1	19567.3	18.2436	0.930309	39334	39329
SHC1	4557.38	0.153569	0.879544	39307	39320
SHC3	10238.8	7.65918	0.952017	39334	39329
SHF	10837.2	2.70286	0.98579	39335	39329
SHF	25909.7	8.50499	0.975625	39334	39329
SRC	33408.9	12.1988	0.988976	39334	39329
SRC	13786.5	4.1955	0.987005	39335	39329
SRC	19073.7	1.20732	0.967229	39307	39320
SYK-N	13049.1	3.0383	0.994344	39334	39329
SYK-N	13350.3	3.45395	0.994344	39335	39329
SYK-N	17073.7	0.802739	0.914508	39307	39320
SYK-NC	51073.7	0.0503324	0.979226	39307	39320
SYK-NC	14073.7	0.726987	0.962274	39334	39329
SYK-NC	25470.9	0.663169	0.880554	39335	39329
TEC	82097.5	22.9794	0.989623	39307	39320
TEC	14467.3	2.14305	0.942073	39335	39329
TEC	15073.7	1.6198	0.914528	39334	39329
TNS3	99683.5	54.1121	0.983416	39307	39320
TNS3	2528.51	0.793862	0.957961	39334	39329
YES1	14073.7	1.17644	0.985653	39335	39329
YES1	14073.7	1.16646	0.985652	39334	39329
YES1	11073.7	0.420558	0.934692	39307	39320
ZAP70-C	13491.2	1.53118	0.977864	39334	39329
ZAP70-C	13073.7	1.51529	0.977434	39335	39329
ZAP70-C	9073.74	0.404225	0.966126	39307	39320

## Sheet: ErbB4 pY833
Protein	Fmax	Kd (uM)	R2	PM Assay Replicate #	Array Fabrication #
ABL1	2765.92	1.47779	0.994995	39342	39336
ABL2	6455.68	2.43983	0.984792	39573	37981
ABL2	14073.7	0.802929	0.98148	39342	39336
ABL2	18073.7	0.581228	0.962695	39335	39329
ABL2	16073.7	0.802823	0.908205	39334	39329
BCAR3	6874.91	0.896442	0.933312	39342	39336
BLK	6393.96	0.980585	0.987913	39342	39336
BLK	21682.4	2.10562	0.978786	39335	39329
BLK	70482.9	0.471768	0.960917	39573	37981
BLK	13073.7	0.80342	0.942194	39334	39329
BLNK	24544.1	10.6729	0.994995	39573	37981
BLNK	24073.7	0.801647	0.983206	39335	39329
BLNK	7916.12	0.923677	0.982045	39342	39336
BLNK	31073.7	1.36909	0.972084	39334	39329
BLNK	40073.7	1.3651	0.96663	39334	39329
BLNK	41073.7	1.15916	0.964482	39335	39329
BMX	16572.2	4.85286	0.97862	39573	37981
BMX	18073.7	1.23771	0.967725	39335	39329
BMX	19073.7	1.61596	0.818982	39334	39329
BTK	23038.1	2.02493	0.982226	39573	37981
BTK	38147.5	0.806089	0.971898	39334	39329
BTK	37073.7	0.801219	0.950947	39335	39329
BTK	13073.7	0.402784	0.948646	39342	39336
CRKL	3837.49	0.672589	0.923975	39342	39336
DAPP1	10073.7	1.60535	0.965922	39335	39329
FER	1893.48	0.660774	0.972405	39342	39336
FGR	12073.7	0.803436	0.992493	39342	39336
FGR	11517.6	3.62022	0.976999	39573	37981
FGR	17073.7	1.1422	0.919616	39335	39329
FGR	15096.4	1.18002	0.90769	39334	39329
GRAP2	11073.7	0.40316	0.981657	39342	39336
GRAP2	34073.7	0.406054	0.965856	39334	39329
GRAP2	31073.7	0.567382	0.957316	39335	39329
GRAP2	12183.9	0.641385	0.844943	39573	37981
GRB10	8209.66	1.23215	0.987507	39342	39336
GRB10	19177.2	1.52288	0.966215	39334	39329
GRB10	15073.7	0.81774	0.926021	39335	39329
GRB14	14367.1	3.41922	0.988733	39334	39329
GRB14	3015.51	0.743211	0.977896	39342	39336
GRB7	66242.5	16.581	0.994995	39573	37981
GRB7	25073.7	1.16843	0.96133	39335	39329
GRB7	11073.7	1.53152	0.93783	39334	39329
GRB7	12383.7	0.782032	0.924824	39342	39336
HCK	12073.7	0.594035	0.994995	39335	39329
HCK	4155.37	0.669617	0.986399	39342	39336
HCK	16073.7	0.674033	0.956347	39334	39329
ITK	19041.5	3.15274	0.991526	39573	37981
ITK	57119.2	1.78601	0.987197	39334	39329
ITK	41073.7	0.801025	0.962862	39335	39329
ITK	16469.7	0.475318	0.953661	39342	39336
LCK	42073.7	0.805602	0.99124	39334	39329
LCK	16500.8	0.582175	0.985153	39342	39336
LCK	17704.1	1.37378	0.971961	39573	37981
LCK	3242.87	0.920694	0.943947	39335	39329
LYN	8677.13	1.09843	0.96812	39342	39336
LYN	21073.7	1.19426	0.910594	39335	39329
LYN	18073.7	1.32383	0.897337	39334	39329
MATK	4155.46	1.46913	0.994995	39342	39336
MATK	19006.3	1.63105	0.95994	39334	39329
MATK	27073.7	1.61073	0.939622	39335	39329
NCK1	10914.4	0.634113	0.977338	39342	39336
NCK1	25073.7	0.809774	0.973722	39334	39329
NCK1	24885.1	0.636372	0.9362	39335	39329
NCK1	6793.93	1.5789	0.89705	39573	37981
NCK2	5977.61	0.808055	0.993946	39342	39336
NCK2	6416.2	3.27662	0.978833	39573	37981
NCK2	19073.7	0.802064	0.976889	39335	39329
NCK2	28026.6	1.62805	0.973692	39334	39329
PIK3R1-C	2010.54	0.861497	0.969192	39342	39336
PIK3R1-NC	6889.96	1.28649	0.990558	39342	39336
PIK3R1-NC	24073.7	1.11599	0.965468	39334	39329
PIK3R1-NC	28073.7	1.60877	0.962105	39335	39329
PIK3R2-N	2287.18	1.36216	0.918334	39342	39336
PIK3R2-NC	5857.94	0.658463	0.990503	39342	39336
PIK3R2-NC	19073.7	0.604047	0.952409	39334	39329
PIK3R2-NC	22073.7	0.801873	0.92429	39335	39329
PIK3R3-C	3301.48	1.67898	0.994995	39342	39336
PIK3R3-NC	26267.2	10.6509	0.994995	39573	37981
PIK3R3-NC	10712.2	1.24748	0.990063	39342	39336
PIK3R3-NC	3678.74	1.84011	0.966556	39335	39329
PIK3R3-NC	36073.7	1.20438	0.965317	39334	39329
PLCG1-C	10579.5	7.04646	0.968569	39342	39336
PLCG1-C	13712.9	1.10637	0.815361	39334	39329
PLCG1-NC	8293.24	1.85133	0.992391	39342	39336
PLCG1-NC	19412.9	2.40595	0.99	39334	39329
PLCG1-NC	31073.7	1.60921	0.935846	39335	39329
PLCG2-N	11573.7	0.820766	0.99006	39342	39336
PLCG2-N	69247.2	19.1932	0.96713	39573	37981
PLCG2-N	36073.7	1.60141	0.950955	39335	39329
PLCG2-N	27073.7	1.39763	0.948716	39334	39329
PLCG2-NC	78479.9	0.940556	0.989551	39573	37981
PLCG2-NC	4575.25	1.12641	0.987446	39342	39336
PLCG2-NC	5867.44	0.469722	0.959442	39335	39329
PLCG2-NC	42147.5	0.200685	0.954924	39334	39329
PTK6	5.1247e+08	357854	0.978355	39573	37981
PTK6	25073.7	1.11995	0.976877	39335	39329
PTK6	30147.5	5.22326	0.969846	39334	39329
PTK6	9478.5	0.838517	0.910878	39342	39336
PTPN11-NC	10472.6	1.30693	0.987846	39342	39336
PTPN11-NC	29073.7	1.13111	0.979925	39335	39329
PTPN11-NC	31073.7	1.60834	0.923934	39334	39329
PTPN6-C	3538.98	0.906895	0.988793	39342	39336
PTPN6-C	13048.3	1.98928	0.927383	39334	39329
PTPN6-NC	13242.4	1.71755	0.994995	39342	39336
PTPN6-NC	22073.7	0.76639	0.958693	39334	39329
PTPN6-NC	47009.8	24.5037	0.955799	39573	37981
PTPN6-NC	36073.7	0.80123	0.921923	39335	39329
RASA1-C	31073.7	1.60844	0.993525	39335	39329
RASA1-C	12328.5	7.43398	0.976863	39573	37981
RASA1-C	4720.55	1.28095	0.950939	39342	39336
RASA1-C	27073.7	1.61051	0.933115	39334	39329
RASA1-N	3775.94	0.785564	0.987153	39342	39336
RASA1-N	11252.3	1.34589	0.974494	39334	39329
RASA1-NC	15573.7	0.815292	0.9705	39335	39329
RASA1-NC	6703.36	1.82663	0.946558	39342	39336
RASA1-NC	16827.9	1.62765	0.919075	39334	39329
SH2B2	2383.66	0.884773	0.989275	39342	39336
SH2B3	7425.74	1.42487	0.994995	39342	39336
SH2B3	26149.3	1.61133	0.926833	39335	39329
SH2B3	22964.7	1.6918	0.896291	39334	39329
SH2D1A	12522.6	6.33345	0.994995	39573	37981
SH2D1A	33073.7	0.80125	0.965335	39334	39329
SH2D1A	14818.1	0.390409	0.95748	39342	39336
SH2D1A	34073.7	0.552598	0.9286	39335	39329
SH2D1B	31902.3	11.8022	0.976417	39573	37981
SH2D1B	26073.7	0.589308	0.948908	39334	39329
SH2D1B	38073.7	0.80114	0.939738	39335	39329
SH2D1B	6914.72	0.536238	0.611795	39342	39336
SH2D2A	6071.57	1.12271	0.992013	39342	39336
SH2D2A	19073.7	1.61418	0.9847	39334	39329
SH2D2A	17073.7	1.33387	0.947454	39335	39329
SH2D3A	50073.7	0.397783	0.985028	39334	39329
SH2D3A	23073.7	0.401557	0.981892	39342	39336
SH2D3A	4966.24	0.516218	0.970303	39335	39329
SH2D3A	24735.1	1.44655	0.526592	39573	37981
SH2D3C	20461.3	2.69462	0.994995	39573	37981
SH2D3C	12034.2	0.591621	0.993407	39342	39336
SH2D3C	29073.7	1.1226	0.975915	39335	39329
SH2D3C	31073.7	1.60877	0.940098	39334	39329
SH3BP2	5098.39	1.77494	0.994995	39342	39336
SH3BP2	77872.5	1.48675	0.977894	39573	37981
SH3BP2	6073.74	0.743875	0.960188	39335	39329
SH3BP2	8773.74	1.12168	0.938857	39334	39329
SHB	3868.41	1.0195	0.991639	39342	39336
SHB	12688.8	1.39957	0.912207	39334	39329
SHC1	9892.64	0.423439	0.906129	39334	39329
SHC1-PTB	3588.47	1.27764	0.994043	39342	39336
SHC1-PTB	16533.3	1.48953	0.961924	39334	39329
SHC1-PTB	17443.7	1.5875	0.960781	39335	39329
SHC2-PTB	11917.1	1.24931	0.992548	39335	39329
SHC2-PTB	19437	1.65834	0.970031	39334	39329
SHC2-PTB	5487.11	4.43954	0.928213	39342	39336
SHC3	17208.1	3.596	0.979599	39334	39329
SHC4	10286.3	7.91007	0.946971	39342	39336
SHE	18290.2	1.52981	0.976236	39334	39329
SHE	5584.95	1.03615	0.943483	39342	39336
SHE	13073.7	0.818408	0.94154	39335	39329
SHF	9812.97	0.7725	0.969927	39342	39336
SHF	3929.94	1.32637	0.969486	39335	39329
SHF	18881.8	6.12287	0.961828	39573	37981
SHF	38073.7	0.592603	0.958251	39334	39329
SLA	3397.25	1.0048	0.994954	39342	39336
SLA2	2256.5	0.749616	0.987851	39342	39336
SOCS2	8293.74	1.45768	0.991773	39335	39329
SOCS2	1739.75	0.446518	0.936812	39342	39336
SOCS2	12073.7	0.821798	0.93564	39334	39329
SOCS5	15941	4.13244	0.962687	39334	39329
SOCS6	7128.68	1.61875	0.990868	39342	39336
SOCS6	26073.7	1.13291	0.962493	39335	39329
SOCS6	23147.5	1.61108	0.960245	39334	39329
SRC	36061.2	1.4438	0.992299	39335	39329
SRC	33073.7	0.801276	0.97671	39334	39329
SRC	7403.27	0.685826	0.93819	39342	39336
STAP1	16073.7	1.60257	0.952312	39335	39329
SUPT6H	5329.76	0.856603	0.992549	39342	39336
SUPT6H	21073.7	1.21022	0.982976	39335	39329
SUPT6H	21095.2	1.61363	0.946443	39334	39329
SYK-C	34073.7	0.80125	0.976139	39335	39329
SYK-C	23152.3	4.4044	0.974708	39573	37981
SYK-C	36073.7	1.19765	0.964383	39334	39329
SYK-C	13147.2	0.417416	0.952691	39342	39336
SYK-N	4873.82	1.72398	0.9938	39335	39329
SYK-N	74784.6	3.02409	0.989195	39573	37981
SYK-N	29073.7	0.801388	0.989137	39342	39336
SYK-N	49073.7	0.732068	0.966947	39334	39329
SYK-NC	10073.7	1.12021	0.987849	39342	39336
SYK-NC	23073.7	0.801812	0.947415	39335	39329
SYK-NC	22073.7	0.802022	0.921632	39334	39329
TEC	35754.8	6.07241	0.994557	39573	37981
TEC	3842.35	0.676918	0.988535	39335	39329
TEC	3536.39	0.707491	0.981033	39334	39329
TEC	16805.4	0.402088	0.973864	39342	39336
TENC1	9684.35	1.39994	0.994995	39342	39336
TENC1	16073.7	1.14988	0.941652	39335	39329
TENC1	11073.7	0.419374	0.905786	39334	39329
TNS1	5839.33	1.01978	0.977098	39342	39336
TNS1	14675.3	1.30363	0.976998	39335	39329
TNS1	16121.1	0.830384	0.944097	39334	39329
TNS3	11073.7	0.579069	0.988946	39342	39336
TNS3	37073.7	0.806495	0.963616	39334	39329
TNS3	2333.55	1.34007	0.959571	39335	39329
TNS3	7656.54	1.09515	0.691163	39573	37981
TNS4	3406.36	0.624512	0.89308	39342	39336
TXK	22073.7	1.61254	0.957975	39335	39329
TXK	6914	1.86419	0.956794	39342	39336
VAV2	7178.6	1.35773	0.975392	39342	39336
VAV2	9300.76	2.86229	0.971871	39573	37981
VAV2	11073.7	1.19044	0.968125	39335	39329
VAV2	13940.4	1.78675	0.925985	39334	39329
VAV3	2940.3	0.79254	0.988179	39342	39336
YES1	15073.7	0.802882	0.992585	39335	39329
YES1	3594.49	1.00608	0.97857	39342	39336
YES1	13073.7	0.603423	0.972736	39334	39329
YES1	35785.7	0.917986	0.945299	39573	37981
ZAP70-C	18073.7	0.582064	0.946034	39342	39336
ZAP70-C	33073.7	1.12767	0.943561	39335	39329
ZAP70-C	13670.4	1.6321	0.941218	39573	37981
ZAP70-C	41073.7	1.60677	0.930617	39334	39329
ZAP70-N	30073.7	1.6095	0.935008	39334	39329
ZAP70-NC	3642	2.67415	0.994131	39335	39329
ZAP70-NC	56134.6	19.8531	0.980544	39573	37981
ZAP70-NC	36073.7	1.43872	0.966865	39334	39329
ZAP70-NC	16636.8	0.543795	0.942006	39342	39336

## Sheet: ErbB4 pY1150
Protein	Fmax	Kd (uM)	R2	PM Assay Replicate #	Array Fabrication #
ABL1	4559.77	0.157287	0.974126	39341	39336
ABL1	2689.6	0.23095	0.962152	39342	39336
ABL1	2349.23	0.533569	0.992047	39358	39336
ABL1	3132.21	0.281143	0.92588	39386	39362
ABL2	15353.2	0.0110665	0.988408	39341	39336
ABL2	8572.9	0.0132425	0.925179	39342	39336
ABL2	12382.5	0.0571934	0.90797	39358	39336
ABL2	12799	0.119471	0.93029	39386	39362
ABL2	2679.16	0.0406783	0.744191	39391	39362
BCAR3	6113.06	1.36334	0.991553	39341	39336
BCAR3	3580.04	3.94444	0.988183	39342	39336
BLK	9644.54	0.893921	0.947575	39341	39336
BLK	41073.7	1.17846	0.964459	39342	39336
BLK	17073.7	1.60312	0.919992	39358	39336
BLK	18244.2	1.52107	0.880826	39386	39362
BLK	11073.7	0.203222	0.904921	39391	39362
BTK	8000.06	3.22984	0.99077	39341	39336
CRK	1918.29	0.0097435	0.991893	39341	39336
CRK	953.695	0.016416	0.93317	39342	39336
CRK	978.289	0.0957341	0.921731	39358	39336
CRKL	8988.11	0.0697754	0.980128	39341	39336
CRKL	3910.77	0.0428298	0.930265	39342	39336
CRKL	6297.2	0.193733	0.899232	39358	39336
CRKL	5097.47	0.194823	0.964302	39386	39362
CRKL	1943.42	0.275899	0.942707	39391	39362
FGR	8590.06	0.440048	0.99276	39341	39336
FGR	4813.81	0.517399	0.989415	39342	39336
FGR	5876.88	0.5531	0.987813	39358	39336
FGR	3600.38	0.881391	0.987813	39386	39362
GRB10	13485.1	6.78576	0.954766	39341	39336
GRB7	22147.5	1.42558	0.916748	39341	39336
GRB7	5042.68	5.25278	0.927321	39342	39336
ITK	9863.52	2.85418	0.986128	39341	39336
LCK	16051.2	2.57315	0.882036	39341	39336
LCK	2101.41	2.36096	0.962774	39342	39336
PIK3R1-N	2682.02	0.236329	0.890678	39341	39336
PIK3R1-N	847.369	0.0896148	0.970521	39342	39336
PIK3R1-NC	7986.7	0.0930075	0.914007	39341	39336
PIK3R1-NC	4118.58	0.118241	0.916036	39342	39336
PIK3R1-NC	2516.41	0.361012	0.95179	39358	39336
PIK3R1-NC	3160.11	0.779994	0.988269	39386	39362
PIK3R2-N	1787.1	0.0680224	0.953312	39341	39336
PIK3R2-N	1454.94	0.336569	0.95897	39342	39336
PIK3R2-NC	8255.06	0.0139207	0.983392	39341	39336
PIK3R2-NC	4116.21	0.0297598	0.981194	39342	39336
PIK3R2-NC	3447.84	0.14723	0.930229	39358	39336
PIK3R2-NC	2598.72	0.250842	0.961131	39386	39362
PIK3R3-C	1419.08	0.289799	0.985256	39342	39336
PIK3R3-C	1300.04	0.24109	0.938416	39386	39362
PIK3R3-N	1506.93	0.0367727	0.916244	39341	39336
PIK3R3-N	1258.64	0.489079	0.913481	39342	39336
PIK3R3-NC	15808.8	0.0167244	0.96827	39341	39336
PIK3R3-NC	7885.41	0.0633606	0.946024	39342	39336
PIK3R3-NC	4758.73	0.220032	0.90243	39358	39336
PIK3R3-NC	4266.83	0.392898	0.978984	39386	39362
PLCG1-C	3131.56	0.601865	0.964575	39341	39336
PLCG1-C	1757.13	0.479499	0.945368	39342	39336
PLCG1-C	2050.35	1.29934	0.988493	39386	39362
PLCG1-NC	2723.45	1.10079	0.980504	39341	39336
PLCG1-NC	1958.79	1.37285	0.971501	39342	39336
PLCG2-N	3828.74	1.87295	0.984314	39341	39336
PLCG2-NC	5318.63	0.640263	0.947769	39341	39336
PLCG2-NC	32540.4	0.17103	0.958076	39342	39336
PLCG2-NC	14253.2	2.16424	0.933938	39358	39336
PLCG2-NC	14842.3	0.799935	0.94446	39386	39362
PLCG2-NC	565.649	0.19872	0.478468	39391	39362
RASA1-C	10107.5	0.173287	0.984733	39341	39336
RASA1-C	2513.87	2.0767	0.961841	39342	39336
RASA1-N	11906.1	0.0806629	0.899187	39341	39336
RASA1-N	7394.69	0.103204	0.93939	39342	39336
RASA1-N	11912.3	0.209276	0.992096	39358	39336
RASA1-N	11073.7	0.20285	0.976745	39386	39362
RASA1-N	7583.7	0.288022	0.958943	39391	39362
RASA1-NC	15727.2	0.0691799	0.958813	39341	39336
RASA1-NC	8231.85	0.0778055	0.947333	39342	39336
RASA1-NC	12328	0.255076	0.916537	39358	39336
RASA1-NC	11051.8	0.477258	0.978164	39386	39362
RASA1-NC	397.728	0.788548	0.927605	39391	39362
SH2B3	6514	1.23032	0.988496	39341	39336
SH2B3	1813.15	0.256032	0.969677	39342	39336
SH2B3	1325.64	0.288568	0.948607	39358	39336
SH2D1A	8959.2	0.755808	0.978035	39341	39336
SH2D1A	3445.79	2.77555	0.981553	39342	39336
SH2D1B	6516.26	3.18227	0.954511	39341	39336
SH2D2A	1822.58	0.302433	0.935935	39341	39336
SH2D3A	9327.84	0.280428	0.950798	39341	39336
SH2D3A	2604.38	1.2542	0.979175	39342	39336
SH2D3A	23768.4	12.0721	0.965648	39358	39336
SH2D3A	11179.6	5.66776	0.821778	39386	39362
SH2D3A	24924.6	6.47358	0.903355	39391	39362
SH2D3C	6873.24	2.87895	0.991233	39341	39336
SH3BP2	53073.7	0.400734	0.953402	39341	39336
SH3BP2	17073.7	1.13515	0.939351	39342	39336
SH3BP2	51353.9	10.5942	0.987772	39358	39336
SH3BP2	17073.7	1.15098	0.932764	39386	39362
SH3BP2	20073.7	1.60275	0.849818	39391	39362
SHB	1950.87	0.253699	0.977824	39341	39336
SHB	1381.28	0.710465	0.926783	39342	39336
SHB	2009.8	0.46122	0.947545	39358	39336
SOCS5	1662.46	0.157763	0.98334	39341	39336
SOCS5	932.345	0.145247	0.945816	39342	39336
SRC	3066.85	0.542854	0.9616	39342	39336
SRC	4030.96	1.62207	0.971701	39358	39336
SRC	6130.52	0.245872	0.924205	39386	39362
SRC	2399.25	0.114968	0.664365	39391	39362
SYK-C	13073.7	1.18132	0.917695	39341	39336
SYK-N	2638.7	1.4043	0.930918	39341	39336
SYK-N	19981.1	19.5382	0.955538	39342	39336
SYK-NC	21073.7	0.801924	0.917303	39341	39336
SYK-NC	41073.7	0.200736	0.946232	39342	39336
SYK-NC	44073.7	0.800952	0.927945	39358	39336
SYK-NC	15073.7	0.600169	0.766394	39386	39362
SYK-NC	6497.31	1.66275	0.94757	39391	39362
TEC	16073.7	1.36114	0.982057	39341	39336
VAV2	6426.26	0.0470378	0.911983	39341	39336
VAV2	3354.67	0.0113999	0.863902	39342	39336
VAV2	1774.9	0.0335247	0.956725	39358	39336
VAV2	1815.85	0.0731089	0.964764	39386	39362
YES1	11239.8	0.0648093	0.949354	39341	39336
YES1	4065.86	0.0662318	0.961356	39342	39336
YES1	6489.39	0.249314	0.955318	39358	39336
YES1	9146.07	0.270176	0.98391	39386	39362
YES1	5078.59	0.176036	0.883405	39391	39362
ZAP70-C	7827.24	2.0561	0.966767	39341	39336
ZAP70-C	5323.7	8.32097	0.973909	39342	39336
ZAP70-NC	10985.7	3.40132	0.979887	39341	39336

## Sheet: ErbB4 1202 (18-mer)
Protein	Fmax	Kd (uM)	R2	PM Assay Replicate #	Array Fabrication #
ABL2	27616	0.997	0.95	39307	39286
ABL2	3351	0.965	0.97	39337	39329
BLK	27589.2	2.29393	0.90411	39351	39336
BLK	11334.5	2.38621	0.922405	39352	39336
BLK	15129	0.447	0.98	39307	39286
BLK	48224	7.842	0.96	39337	39329
HSH2D	8687	0.967	0.99	39307	39286
ITK	2843	0.723	0.92	39307	39286
NCK2	27886	10.06	0.96	39307	39286
PIK3R1-NC	1992	0.167	0.91	39307	39286
PIK3R1-NC	5709	0.544	0.95	39337	39329
PIK3R2-NC	3047	0.653	0.96	39337	39329
PIK3R3-NC	3877.74	1.72161	0.99	39352	39336
PIK3R3-NC	11074	1.184	0.91	39337	39329
PLCG1-C	9276	1.26	0.95	39307	39286
PLCG2-NC	6106.94	0.407581	0.861105	39351	39336
PLCG2-NC	13073.7	0.605493	0.957254	39352	39336
PLCG2-NC	3937	1.531	0.96	39337	39329
RASA1-N	8016	0.662	0.97	39307	39286
RASA1-NC	14306	8.555	0.87	39337	39329
SH2D1A	59330	30.9	0.98	39307	39286
SH2D3A	34422	1	0.99	39307	39286
SH3BP2	27073.7	1.61087	0.908152	39351	39336
SH3BP2	33804.5	15.934	0.992718	39352	39336
SH3BP2	57368	0.495	0.95	39307	39286
SH3BP2	9186	2.062	0.92	39337	39329
SHF	6241	11.918	0.9	39337	39329
SRC	48926	0.399	0.92	39307	39286
SYK-NC	41073.7	0.805589	0.923301	39351	39336
SYK-NC	27073.7	1.15303	0.943437	39352	39336
SYK-NC	53056	0.947	0.97	39307	39286
SYK-NC	19074	1.417	0.89	39337	39329
TXK	13000000000000	4400000000	0.93	39307	39286
VAV2	11354	9.5	0.9	39307	39286
YES1	46147.5	1.60538	0.96177	39351	39336
YES1	11073.7	0.417314	0.912942	39352	39336
YES1	31074	0.35	0.98	39307	39286
YES1	7674	1.438	0.97	39337	39329

## Sheet: ErbB4 pY1221 (18-mer)
Protein	Fmax	Kd (uM)	R2	PM Assay Replicate #	Array Fabrication #
ABL1	1845	0.25	0.94	39307	39286
ABL2	5456.34	0.905679	0.932667	39352	39336
ABL2	7926	0.283	0.9	39307	39286
BLK	14053.6	1.15458	0.922817	39351	39336
BLK	13073.7	1.1605	0.989301	39352	39336
BLK	5030	0.583	0.95	39307	39286
BLNK	5254	3.996	0.9	39307	39286
BMX	2449	0.419	0.92	39307	39286
CRK	36097	64.536	0.98	39307	39286
CRKL	3869	0.107	0.94	39307	39286
GRB10	4342	0.234	0.97	39307	39286
HCK	1825	0.07	0.91	39307	39286
HSH2D	2043	0.994	0.62	39307	39286
NCK2	929	0.211	0.88	39307	39286
PIK3R2-NC	3954	1.343	0.95	39307	39286
PIK3R3-NC	2625	0.544	0.9	39307	39286
PLCG2-NC	13689.7	1.24923	0.927036	39352	39336
PLCG2-NC	4917	1.382	0.93	39307	39286
PTPN6-C	800970	716.006	0.99	39307	39286
SH2D1A	2229	0.766	0.83	39307	39286
SH2D3A	5319	0.605	0.9	39307	39286
SH3BP2	39759.1	2.36138	0.911976	39351	39336
SH3BP2	40186.8	10.8619	0.988056	39352	39336
SH3BP2	10863	1.236	0.95	39307	39286
SHF	5541	1.193	0.95	39307	39286
SRC	5448	0.443	0.97	39307	39286
SYK-N	18469.7	15.6048	0.99	39352	39336
SYK-N	6750	9.489	0.9	39307	39286
SYK-NC	39073.7	0.810671	0.938866	39351	39336
SYK-NC	41073.7	1.28976	0.914329	39352	39336
SYK-NC	10806	0.285	0.91	39307	39286
TNS4	1529	0.323	0.94	39307	39286
YES1	13084.6	1.32317	0.979089	39352	39336
YES1	36246	0.818	0.94	39307	39286
ZAP70-C	1866.11	0.791391	0.928782	39352	39336

[truncated: 2 more sheets: ErbB4 pY1262, ErbB4 pY1301 (18-mer)]
