# Supplementary material for: Comprehensive Binary Interaction Mapping of SH2 Domains via Fluorescence Polarization Reveals Novel Functional Diversification of ErbB Receptors
Source: PLoS One. 2012 Sep 4;7(9):e44471. doi: 10.1371/journal.pone.0044471 (PMC3433420; doi:10.1371/journal.pone.0044471)
Supplement: Table S17 — Peptides synthesized for in-house protein microarrays. (XLSX) [file pone.0044471.s033.xlsx]

## Sheet: S17 PM peptides
Receptor	pTyr	Sequence*	Length
ErbB1	727	FGTVpYKGLWIPEd	13-mer
ErbB1	764	LDEApYVMASVDNd	13-mer
ErbB1	801	CLLDpYVREHKDNd	13-mer
ErbB1	827	KGMNpYLEDRRLVd	13-mer
ErbB1	869	EEKEpYHAEGGKVd	13-mer
ErbB1	900	DVWSpYGVTVWELd	13-mer
ErbB1	915	GSKPpYDGIPASEd	13-mer
ErbB1	978	DPQRpYLVIQGDEd	13-mer
ErbB1	998	DSNFpYRALMDEEd	13-mer
ErbB1	1016	DADEpYLIPQQGFd	13-mer
ErbB1	1069	FLQRpYSSDPTGAd	13-mer
ErbB1	1092	PVPEpYINQSVPKd	13-mer
ErbB1	1110	QNPVpYHNQPLNPd	13-mer
ErbB1	1138	GNPEpYLNTVQPTd	13-mer
ErbB1	1172	DNPDpYQQDFFPKd	13-mer
ErbB1	1197	ENAEpYLRVAPQSd	13-mer
ErbB2	685	KIRKpYTMRRLLQd	13-mer
ErbB2	735	FGTVpYKGIWIPD	13-mer
ErbB2	772	LDEApYVMAGVGS	13-mer
ErbB2	781	VGSPpYVSRLLGId	13-mer
ErbB2	803	QLMPpYGCLLDHVd	13-mer
ErbB2	835	KGMSpYLEDVRLVd	13-mer
ErbB2	877	DETEpYHADGGKVd	13-mer
ErbB2	1005	DSTFpYRSLLEDDd	13-mer
ErbB2	1023	DAEEpYLVPQQGFd	13-mer
ErbB2	1112	PLQRpYSEDPTVP	13-mer
ErbB2	1127	ETDGpYVAPLTCSd	13-mer
ErbB2	1139	PQPEpYVNQPDVRd	13-mer
ErbB2	1196	ENPEpYLTPQGGAd	13-mer
ErbB2	1221	FDNLpYYWDQDPPEd	13-mer
ErbB2	1222	DNLYpYWDQDPPEd	13-mer
ErbB2	1248	ENPEpYLGLDVPVd	13-mer
ErbB2	1139	PQPEpYVNQPDVRd	13-mer
ErbB3	665	GTFLpYWRGRRIQd	13-mer
ErbB3	680	AMRRpYLERGESId	13-mer
ErbB3	789	LVTQpYLPLGSLL	13-mer
ErbB3	823	AKGMpYYLEEHGMd	13-mer
ErbB3	824	KGMYpYLEEHGMVd	13-mer
ErbB3	868	KQLLpYSEAKTPId	13-mer
ErbB3	975	DPPRpYLVIKRES	13-mer
ErbB3	1054	PSSGpYMPMNQGNd	13-mer
ErbB3	1132	GDSApYHSQRHSL	13-mer
ErbB3	1159	DVNGpYVMPDTHL	13-mer
ErbB3	1197	EDEEpYEYMNRRRd	13-mer
ErbB3	1222	EELGpYEYMDVGSd	13-mer
ErbB3	1224	LGYEpYMDVGSDLd	13-mer
ErbB3	1260	PDEDpYEYMNRQRd	13-mer
ErbB3	1262	EDYEpYMNRQRDGd	13-mer
ErbB3	1276	PGGDpYAAMGACPd	13-mer
ErbB3	1289	SEQGpYEEMRAFQd	13-mer
ErbB3	1307	PHVHpYARLKTLR	13-mer
ErbB3	1328	DNPDpYWHSRLFPd	13-mer
ErbB4	807	CLLEpYVHEHKDNd	13-mer
ErbB4	833	KGMMpYLEERRLVd	13-mer
ErbB4	906	DVWSpYGVTIWELd	13-mer
ErbB4	1022	DAEEpYLVPQAFN	13-mer
ErbB4	1056	PPPApYTPMSGNQd	13-mer
ErbB4	1081	VSVPpYRAPTSTI	13-mer
ErbB4	1128	STQRpYSADPTVF	13-mer
ErbB4	1150	DEEGpYMTPMRDKd	13-mer
ErbB4	1162	PKQEpYLNPVEENd	13-mer
ErbB4	1188	DNPEpYHNASNGPd	13-mer
ErbB4	1262	YLQEpYSTKYFYKd	13-mer
ErbB4	1284	ENPEpYLSEFSLKd	13-mer
ErbB3	912	ELMTFGAEPpYAGLRLAEd	18-mer
ErbB4	733	LGSGAFGTVpYKGIWVPEd	18-mer
ErbB4	875	RLLEGDEKEpYNADGGKMd	18-mer
ErbB4	984	SRMARDPQRpYLVIQGDDd	18-mer
ErbB4	1035	QAFNIPPPIpYTSRARIDd	18-mer
ErbB4	1066	TPMSQNQFVpYRDGGFAAd	18-mer
ErbB4	1202	NGPPKAEDEpYVNEPLYLd	18-mer
ErbB4	1208	EDEYVNEPLpYLNTFANTd	18-mer
ErbB4	1221	FANTLGKAEpYLKNNILSd	18-mer
ErbB4	1242	AKKAFDNPDpYWNHSLPPd	18-mer
ErbB4	1266	DYLQEYSTKpYFYKQNGRd	18-mer
ErbB4	1268	LQEYSTKYFpYKQNGRIRd	18-mer
ErbB4	1301	PGTVLPPPPpYRHRNTd	18-mer
